# Supplementary material for: Predictors of health-related quality of life among patients with diabetes on follow-up at Nekemte specialised Hospital, Western Ethiopia: a cross-sectional study
Source: PubMed Central journal article supplement — BMJ Open. 2020 Jul 28;10(7):e036106. doi: 10.1136/bmjopen-2019-036106 (PMC7389510; doi:10.1136/bmjopen-2019-036106), 2020-07-28
Supplement: bmjopen-2019-036106.draft_revisions.pdf [file bmjopen-2019-036106.draft_revisions.pdf]

# BMJ Open

BMJ Open is committed to open peer review. As part of this commitment we make the peer review history of every article we publish publicly available.

When an article is published we post the peer reviewers' comments and the authors' responses online. We also post the versions of the paper that were used during peer review. These are the versions that the peer review comments apply to.

The versions of the paper that follow are the versions that were submitted during the peer review process. They are not the versions of record or the final published versions. They should not be cited or distributed as the published version of this manuscript.

BMJ Open is an open access journal and the full, final, typeset and author-corrected version of record of the manuscript is available on our site with no access controls, subscription charges or pay-per-view fees (<http://bmjopen.bmj.com>).

If you have any questions on BMJ Open's open peer review process please email [info.bmjopen@bmj.com](mailto:info.bmjopen@bmj.com)

# BMJ Open

BMJ Open is committed to open peer review. As part of this commitment we make the peer review history of every article we publish publicly available.

When an article is published we post the peer reviewers' comments and the authors' responses online. We also post the versions of the paper that were used during peer review. These are the versions that the peer review comments apply to.

The versions of the paper that follow are the versions that were submitted during the peer review process. They are not the versions of record or the final published versions. They should not be cited or distributed as the published version of this manuscript.

BMJ Open is an open access journal and the full, final, typeset and author-corrected version of record of the manuscript is available on our site with no access controls, subscription charges or pay-per-view fees (<http://bmjopen.bmj.com>).

If you have any questions on BMJ Open's open peer review process please email [info.bmjopen@bmj.com](mailto:info.bmjopen@bmj.com)

# BMJ Open

## Predictors of health related quality of life among diabetic patients on follow up at Nekemte Specialized Hospital, Western Ethiopia: A cross sectional study

|                               |                                                                                                                                                                                                                                                                                                   |
|-------------------------------|---------------------------------------------------------------------------------------------------------------------------------------------------------------------------------------------------------------------------------------------------------------------------------------------------|
| Journal:                      | <i>BMJ Open</i>                                                                                                                                                                                                                                                                                   |
| Manuscript ID                 | bmjopen-2019-036106                                                                                                                                                                                                                                                                               |
| Article Type:                 | Original research                                                                                                                                                                                                                                                                                 |
| Date Submitted by the Author: | 30-Nov-2019                                                                                                                                                                                                                                                                                       |
| Complete List of Authors:     | Feyisa, Bikila; Wollega University, Department of Public Health, Institute of Health Sciences<br>Yilma, Mekdes; Wollega University, Department of Public Health, Institute of Health Sciences<br>Tolessa, Belachew; Wollega University, Department of Public Health, Institute of Health Sciences |
| Keywords:                     | DIABETES & ENDOCRINOLOGY, Diabetic nephropathy & vascular disease < DIABETES & ENDOCRINOLOGY, Diabetic neuropathy < DIABETES & ENDOCRINOLOGY, Diabetic retinopathy < DIABETES & ENDOCRINOLOGY                                                                                                     |
|                               |                                                                                                                                                                                                                                                                                                   |

SCHOLARONE™  
Manuscripts

1  
2  
3  
4 **Predictors of health related quality of life among diabetic patients on follow up at Nekemte**  
5 **Specialized Hospital, Western Ethiopia: A cross sectional study**

6 **Bikila Regassa Feyisa\*<sup>1</sup>, Mekdes Tigistu Yilma<sup>1</sup>, Belachew Etana Tolessa<sup>1</sup>**

7  
8 Email: BR\*:[bikregasa@gmail.com](mailto:bikregasa@gmail.com); ORCID ID: 0000-0002-7191-0218

9  
10 MT:[mekdestigistu10@gmail.com](mailto:mekdestigistu10@gmail.com); ORCID ID: 00 00000216246529

11  
12 BE:[ba.etana@gmail.com](mailto:ba.etana@gmail.com); ORCID ID: 0000-0001-9296-2095

13  
14  
15 **Affiliation:** <sup>1</sup> Department of Public health, Institute of Health Sciences, Wollega University, Ethiopia, P.O. Box: 395

16  
17 **Acknowledgements**

18  
19 We are grateful to Wollega University, the study participants, data collectors and all other personnel who contribute  
20 their valuable input for the study to be accomplished.  
21

22  
23  
24 **Abstract**

25 **Objective:** To assess health related quality of life (HRQoL) and its predictors among diabetic patients on follow up  
26 at Nekemte Specialized Hospital (NSH) in Western Ethiopia.  
27

28 **Design, setting and participants:** This facility based cross sectional study was conducted among 224 diabetic  
29 patients on follow up at one of the public hospitals in western Ethiopia.  
30

31 **Main outcome measured:** HRQoL was measured by using the Medical Outcome Study 36-item Short Form Health  
32 Survey from 15<sup>th</sup> April to 5<sup>th</sup> June. Structured questionnaire was used for data the collection from participants  
33 selected by systematic random sampling. Multiple linear regression was used for final model.  
34  
35

36 **Result:** A total of 215 diabetic patients were involved in the study with the response rate of 96%. The mean score of  
37 the overall HRQoL of the study participants was found to be 50.30 ± 18.08 with highest mean score in physical  
38 functioning and lowest mean score in general health domain. Age, education status, history of smoking, feeling of  
39 stigmatized and Body mass index (BMI) were inversely associated while being male, being married, absence of co  
40 morbidity and absence of chronic complications related to diabetes mellitus were found to be positively associated  
41 with overall HRQoL.  
42  
43  
44

45 **Conclusion:** The overall HRQoL of diabetic patients on follow up at the study area was found to be moderate.  
46 General health, mental health, bodily pain and vitality were the most affected domains. Both the mental and physical  
47 components need to be considered when caring the diabetic patients on follow up beyond provision of treatment.  
48  
49

50  
51 **Key words:** diabetic patients, health related quality of life, Nekemte  
52  
53  
54  
55  
56  
57

## Strength and limitations of this study

- The study was the first of its kind in assessing the predictors of health-related quality of life (HRQoL) among both diabetes mellitus type I and type II in Ethiopia.
- The tools used was validated across different cultures
- Eight domains of HRQoL and two component summary scores were used to make the measurement more specific.
- The cross sectional nature of the study design made the result of the study difficult to identify either the cause or the effect comes first.

## Introduction

Diabetes Mellitus (DM) is defined as a metabolic disorder of numerous etiology which is characterized by chronic high blood glucose level ( $>126$  mg/dl for fasting blood sugar and /or a 2-hour postprandial glucose of  $\geq 200$  mg/dl or if the individual had symptoms of diabetes and a random plasma glucose  $\geq 200$  mg/dl (confirmed by repeat testing) with disturbances of carbohydrate, fat and protein metabolism resulting from problems encountered in either insulin secretion problems (in case of type 1 diabetes mellitus or insulin action problem (type 2 diabetes mellitus) or both [1-3].

Diabetes mellitus is becoming a confronting problem of the time that have a considerable impact on health status and quality of life. It is considered an urgent public health problem because it has a pandemic potential, which can influence the HRQoL negatively [2, 15, 16].

Worldwide, 8.8 % of adults aged 20-79 years had diabetes in 2015 which was projected to reach 366 million in 2030 and 642 million (one in ten adults) by 2040, among which about 75% lived in low- and middle-income countries. Globally about 5 million deaths were attributable to diabetes in the 20–99 years' age range [4, 6].

There is now a consensus that the health of general population cannot be well characterized from the analyses of mortality and morbidity statistics alone and that there is also a need to consider health in terms of people's assessment of their sense of wellbeing and ability to perform social roles [7, 8].

Health-related quality of life (HRQoL) is a multidimensional concept that focuses on the impact of illness and treatment on patients, and it can measure patients' perceptions of illness and treatment, their perceived needs for healthcare providers and their preferences for treatment and outcomes of the disease [9,10].

Health related quality of life is not only concerns subjective but also objective measurements of the individual with certain conditions. It has been defined as “an overall general well-being that comprises objective descriptors and subjective evaluations of physical, material, social, and emotional well-being together with the extent of personal development and purposeful activity, all weighted by a personal set of values [11].

Diabetes Mellitus negatively influences HRQoL. This negative influence affects many aspects of a person's life, including the psychological impact of being chronically ill, dietary restrictions, changes in social life, symptoms of inadequate metabolic system, chronic complications and in due course lifelong infirmities [12, 13].

Studies have identified that diabetic patients' HRQoL is decreased by different domains such as role limitation due to the disease, emotional disturbances, pain, and fatigability. Different factors related to health related quality of life among diabetic patients also affect both quality and quantity of life. These are socio demographics and economic status, behavioral, clinical and social related factors [18, 19].

1  
2 Diabetes mellitus permanently changes the patient's life style. Daily self-care, consisting of daily insulin injection or  
3 oral anti diabetic agents, self-monitoring of blood glucose and diabetic recommended diet has an impact on HRQoL.  
4 Moreover, the acute and chronic complications which might develop in due course affect the patients HRQoL [20].  
5 In Ethiopia, even though programs have been launched regarding the chronic diseases management, prevention,  
6 screening, diagnosis, treatment and care, little is emphasized on factors that affect the HRQoL among the patients  
7 [21]. The guideline lacks the specific areas of HRQoL dimension which is affected by the disease. The existing  
8 articles and reviews have tried to indicate the epidemiology, complications, therapies, comparisons of treatments and  
9 health strategies but the data regarding associated factors of HRQoL and how much it is actually affected by the  
10 condition is scarce [20].  
11 Therefore, this study was designed to predict the level of health related quality of life and factors associated with it  
12 among diabetic patients in Nekemte Specialized Hospital.  
13  
14

## 15 **Research Design and Method**

### 16 **Study Design and setting**

17 Facility based cross sectional study design was employed from 15<sup>th</sup> April to 5<sup>th</sup> June, 2019. The study was conducted  
18 among diabetic patients on follow up at Nekemte Specialized Hospital (NSH) which is found in Nekemte City and  
19 located to Western Ethiopia which is 331 km away from the capital city of Ethiopia, Addis Ababa.  
20

21 Diabetic follow up and care services started separately as chronic diseases clinic at the Hospital in 2010 with 96  
22 cases. According to the unpublished report of NSH taken on the 1<sup>st</sup> February, 2019, five hundred ninety one diabetic  
23 patients of both type 1 and type 2 were on follow up at the chronic disease clinic.  
24

### 25 **Eligibility criteria**

26 All known type I and type II DM patients who have been on follow up for at least one year duration and age greater  
27 than 18 years at NSH were included while diabetic patients who were seriously ill and could not respond to the  
28 interview were excluded from the study.  
29

### 30 **Sample size and sampling procedure**

31 The sample size was determined assuming a normally distributed independent mean, taking mean age value with  
32 standard deviation of 15.208 from previous study, 95% CI ( $Z_{\alpha/2}=1.96$ ) and 5% marginal error. After calculating  
33 correction formula and adding 5% non response rate, the final sample size became 224.  
34

35 Systematic random sampling was used to select the study participants. The sampling interval was developed from  
36 the diabetic identification number of the patients from the registry notebook and calculated by dividing the total  
37 number of diabetic patients on follow up by the calculated sample size.  
38

### 39 **Data collection procedure**

40 Data was collected using interviewer administered structured questionnaire which was adopted from the WHOQOL-  
41 BREF tool. The English version of the questionnaire was translated to Afaan Oromoo (local language) and  
42

1 translated back to English by other language experts to check its consistency. Four data collectors and one  
2 supervisor were recruited.  
3  
4

### 5 **Instruments**

6  
7  
8 The instrument consists of the WHO SF-36 item questionnaires adopted from WHOQOL –BREF instrument and  
9 socio demographic and economic profiles. The SF-36 items consists of 36 questions containing physical functioning  
10 (10 items), role limitation due to physical health (4 items), body pain (2 items), vitality (4 items), social functioning  
11 (2 items), role limitation due to emotional problem (3 items), mental health (5 items) and general health (5 items).  
12  
13

### 14 **Data processing analysis**

15  
16 Each item of SF-36 was scored on linear scale and the negatively worded questions were inversely coded before any  
17 attempt of analysis. The score of each domain was obtained by summation of the corresponding items. The scores  
18 were then be linearly transformed on 0-100 scale. Mean scores were then be adjusted to make the domain scores  
19 comparable with the scores used in the WHOQoL-100 (Lower scores denote lower quality of life).  
20  
21

22  
23 Summary scores on two subscales, the Physical Component Score (PCS) and Mental Component Score (MCS)  
24 derived from principal component factor analysis (PCA).  
25

26  
27 Dummy variables were created for categorical variables that have more than two categories like marital status,  
28 educational status, age category and the drug regimen.

29  
30 For the internal consistency reliability of the SF-36 items, Cronbach's alpha was checked and found to be 0.876  
31 which was in the acceptable level.  
32

33  
34 Beta ( $\beta$ -Coefficient) was used to interpret the strength of predictors of HRQoL. The degree of association between  
35 pairs of variables was measured by Pearson's correlation coefficient (r). The independent variables at  $P < 0.05$  were  
36 considered as statistically significant. Multicollinearity was checked using variance inflation factors (VIFs). All  
37 covariates had value of  $VIF < 10$  which is tolerable.  
38

### 39 **Patient and Public involvement**

40  
41 Patients were not involved in the study  
42

### 43 **Results**

#### 44 **Socio demographic characteristics**

45  
46 A total of 215 diabetic patients on follow up at NSH included in the analysis with response rate of 96%.

47  
48 Among the total respondents, 122 (56.7%) of them were males with mean age of 41.60 years with standard  
49 deviation (SD) of  $\pm 15.42$  and majority, 141 (65.6%) of them were from urban resident. Regarding the marital  
50 status, more than half, 146 (67.9%) of the total respondents were married among which males accounted for  
51 58.9% and majority, 198 (92.10%) of them were Oromo. The mean family size of the respondents was 4.83 with  
52 SD of  $\pm 1.55$ . Thirty eight (17.70%) of the study participants could not read and write and only 52 (24.20%) of them  
53 were employed either at government and/or nongovernmental organizations (**Table 1**).  
54  
55  
56  
57

Table 1: Socio demographic and socio economic characteristics of diabetic patients on follow up at NSH, Nekemte, East Wollega, West Ethiopia, 15th April -5th June, 2019, (n=215).

| Variables                             | Frequency (n=215)   | Percentage |
|---------------------------------------|---------------------|------------|
| <b>Sex</b>                            |                     |            |
| Male                                  | 122                 | 56.7       |
| Female                                | 93                  | 43.3       |
| <b>Mean age in year</b>               | 41.60 ( ± SD 15.42) |            |
| <b>Residence</b>                      |                     |            |
| Urban                                 | 141                 | 65.6       |
| Rural                                 | 74                  | 34.4       |
| <b>Marital status</b>                 |                     |            |
| Married                               | 146                 | 67.9       |
| Single                                | 42                  | 19.5       |
| Divorced                              | 6                   | 2.8        |
| Widowed                               | 21                  | 9.8        |
| <b>Ethnicity</b>                      |                     |            |
| Oromo                                 | 198                 | 92.1       |
| Amhara                                | 9                   | 4.2        |
| Guraghe                               | 5                   | 2.3        |
| Other <sup>a</sup>                    | 3                   | 1.4        |
| <b>Educational status</b>             |                     |            |
| Cannot read and write                 | 38                  | 17.7       |
| Grade 1-8                             | 63                  | 29.3       |
| Grade 9-12                            | 50                  | 23.3       |
| College/University                    | 64                  | 29.8       |
| <b>Occupation</b>                     |                     |            |
| Government/NGO employee               | 52                  | 24.2       |
| Merchant                              | 23                  | 10.7       |
| Farmer                                | 41                  | 19.1       |
| Housewife                             | 46                  | 21.4       |
| Retired                               | 23                  | 10.7       |
| Other <sup>b</sup>                    | 30                  | 14         |
| <b>Economic status (Wealth index)</b> |                     |            |
| Poorest                               | 43                  | 20         |
| Poor                                  | 38                  | 17.7       |
| Medium                                | 46                  | 21.4       |
| Wealthy                               | 45                  | 20.9       |
| Wealthiest                            | 43                  | 20         |

<sup>a</sup>Other (Tigre, Silte)    <sup>b</sup>Other (Student, carpenter)

### Medical history and health condition

More than half, 125 (58.1%) of the study participants had type 2 diabetes mellitus. Almost half, 108 (50.2%) of them had been diagnosed within last five years. Regarding treatment they were taking, 99 (46%) of the patients were using only insulin followed by 93 (43.3%) and 23 (10.7%) of them were using oral hypoglycemic agents and both insulin and oral hypoglycemic agents respectively.

Regarding the co morbidity status, nearly half, 103 (47.9%) of the study participants were co morbid with hypertension which accounts to 85 (82.5%) cases. Sixty three (29.3%) of the study participants had diabetes related acute complication in which 40 (63.5%), 20 (31.7%) and 3 (4.8%) constituted DKA, Hypoglycemia and non ketotic hyperosmolar state respectively. Sixty nine of the study subjects had diabetes related chronic complications which accounted around 32.1% where diabetic neuropathy (including foot ulcer, peripheral pain, and gangrene) covered almost half, 49.3% as illustrated in **table 2**.



Table 2: Medical history and health condition of diabetic patients on follow up at NSH, Nekemte, East Wollega, West Ethiopia, 15th April -5th June, 2019, (n=215).

| Variable                                                 | Frequency (n) | Percent(%) |
|----------------------------------------------------------|---------------|------------|
| <b>Duration of DM (years)</b>                            |               |            |
| <5                                                       | 108           | 50.20      |
| 6-10                                                     | 59            | 27.40      |
| 11-15                                                    | 32            | 14.90      |
| >15                                                      | 16            | 7.40       |
| <b>Drug regimen</b>                                      |               |            |
| Insulin only                                             | 99            | 46         |
| Oral hypoglycemic agents                                 | 93            | 43.3       |
| Insulin and oral hypoglycemic agents                     | 23            | 10.7       |
| <b>Presence of co morbidity</b>                          |               |            |
| Yes                                                      | 103           | 47.9       |
| No                                                       | 112           | 52.1       |
| <b>Presence of diabetic related chronic complication</b> |               |            |
| Yes                                                      | 69            | 32.1       |
| No                                                       | 146           | 67.9       |
| <b>Type of chronic complication</b>                      |               |            |
| Diabetic neuropathy                                      | 34            | 49.30      |
| Diabetic Retinopathy                                     | 19            | 27.50      |
| Diabetic nephropathy                                     | 14            | 20.30      |
| Other                                                    | 2             | 2.80       |
| <b>Body mass index (BMI) (kg/m<sup>2</sup>)</b>          |               |            |
| <18.5                                                    | 5             | 2.30       |
| 18.5-25                                                  | 122           | 56.70      |
| 25-30                                                    | 80            | 37.20      |
| >30                                                      | 8             | 3.7        |

### Health related quality of life of the study participants

Among the eight domains of HRQoL, the study participants scored highest ( $63.19 \pm 34.36$ ) and lowest ( $30.21 \pm 22.95$ ) mean score on physical functioning and general health domain respectively. When analyzing the HRQoL by domains general health, mental health, bodily pain and vitality had mean score below 50 indicating that they were the most affected domains among the diabetic patients. The transformed mean score of the overall HRQoL of the study participants was found to be  $50.30 \pm 18.08$  with the minimum and maximum score of 16.38 and 79.13 respectively (Table 3).

Two component scores of the HRQoL was also generated by PCA with the total variance explained 66.77%. The higher mean score was found for the mental component score ( $51.77 \pm 16.72$ ) with the maximum score of 80.75.

Table 3 : The eight domains of HRQoL, the overall HRQoL and the two component scores of HRQoL with their mean score of diabetic patients at NSH, East Wollega , West Ethiopia, 15th April -5th June, 2019,(n=215)

| Domains of HRQoL, Overall HRQoL, PCS and MCS  | Mean  | SD    | Minimum score (%) | Maximum score (%) |
|-----------------------------------------------|-------|-------|-------------------|-------------------|
| Physical Functioning (PF)                     | 63.19 | 34.36 | 0                 | 100               |
| Role limitation due to physical health (RP)   | 53.37 | 44.8  | 0                 | 100               |
| Role limitation due to emotional problem (RE) | 52.71 | 45.82 | 0                 | 100               |
| Energy/Fatigue (VT)                           | 48.47 | 7.78  | 20                | 75                |
| Emotional wellbeing (MH)                      | 49.84 | 8.02  | 20                | 72                |
| Social Functioning (SF)                       | 56.04 | 30.13 | 0                 | 100               |
| Bodily Pain (BP)                              | 48.60 | 11    | 12.5              | 80                |
| General Health (GH)                           | 30.21 | 22.95 | 0                 | 95                |
| Overall HRQoL                                 | 50.30 | 18.08 | 16.38             | 79.13             |
| Physical Component Score (PCS)                | 48.84 | 21.87 | 10                | 87.50             |
| Mental Component Score (MCS)                  | 51.77 | 16.72 | 19.75             | 80.75             |

#### Predictors of health related quality of life of diabetic patients

The multiple linear regression model indicated that a unit increase in age would likely decrease health related quality of life of diabetic patients by 0.25 ( $\beta=-0.25$ , 95% CI, -0.43.55, -0.07,  $p=0.007$ ) controlling all other independent variables.

Males had about five times better HRQoL when compared to their counter parts ( $\beta=5.23$ , 95% CI, 1.10-9.36,  $p=0.013$ ). As for marital status, those who married had about five times better HRQoL when compared to those who were single controlling for all other independent variables ( $\beta=5.30$ , 95% CI, 0.88-10.52.  $P=0.046$ ).

Regarding the educational level the respondents achieved, those who were unable to read and write were about 9 times lower HRQoL ( $\beta=-8.81$ , 95% CI, -14.88 to -2.82,  $P=0.004$ ) when compared to those who achieved college and above after controlling all other predictors.

History of smoking was found to affect the HRQoL status of the diabetic patients. Diabetic patients who had history of smoking had nine units times lower HRQoL ( $\beta=-9.03$ , 95% CI, -15.23- -4.69,  $P<0.001$ ) when compared to their counter parts. In the same way, feeling of stigmatized because of being diabetic patient would likely decrease HRQoL by 5.25 units ( $\beta=-5.25$ , 95% CI, -8.94 to -1.56,  $P=0.005$ ) compared to their counterparts.

Absence of co morbid conditions and chronic complications related with diabetes mellitus was found to increase HRQoL when compared to their counter parts. In both cases, those who had not the condition had about six units better HRQoL than their counterparts. As for BMI, the increase in one unit of BMI would likely decrease the HRQoL by 3.56 units ( $\beta=-3.56$ , 95% CI, -6.94- -0.18,  $P=0.009$ ) **Table 4**

Table 4: Multiple linear regression analysis of diabetic patients on follow up at NSH, East Wollega, West Ethiopia, 15th April -5th June, 2019, (n=215)

| Variables                          | Unstandardized Coefficient |       | Standardized Coefficient | 95% CI |       | P-value        |
|------------------------------------|----------------------------|-------|--------------------------|--------|-------|----------------|
|                                    | <i>B</i>                   | SE    | $\beta$                  | Lower  | Upper |                |
| <b>(Constant)</b>                  | 69.41                      | 10.31 |                          | 49.16  | 89.74 | 0.000          |
| <b>Sex</b>                         |                            |       |                          |        |       |                |
| Female                             | 1                          | 1     | 1                        | 1      | 1     | 1              |
| Male                               | 5.23                       | 2.11  | 0.14                     | 1.10   | 9.36  | <b>0.013*</b>  |
| <b>Age</b>                         | -0.25                      | 0.08  | -0.20                    | -0.43  | -0.07 | <b>0.007*</b>  |
| <b>Marital status</b>              |                            |       |                          |        |       |                |
| Single                             | 1                          | 1     | 1                        | 1      | 1     | 1              |
| Married                            | 5.30                       | 2.69  | 0.11                     | 0.88   | 10.52 | <b>0.046*</b>  |
| Divorced                           | -4.60                      | 5.26  | -0.04                    | -14.98 | 5.78  | 0.38           |
| Widowed                            | -4.07                      | 3.42  | -0.07                    | -10.81 | 2.67  | 0.24           |
| <b>Educational status</b>          |                            |       |                          |        |       |                |
| Cannot read and write              | -8.81                      | 3.06  | -0.19                    | -14.88 | -2.82 | <b>0.004*</b>  |
| Grade 1-8                          | -2.94                      | 2.49  | -0.07                    | -7.84  | 1.97  | 0.24           |
| Grade 9-12                         | 0.04                       | 2.62  | 0.001                    | -5.13  | 5.22  | 0.98           |
| College and above                  | 1                          | 1     | 1                        | 1      | 1     | 1              |
| <b>Smoking history</b>             |                            |       |                          |        |       |                |
| Yes                                | -9.03                      | 2.66  | -0.21                    | -15.23 | -4.69 | <b>0.001**</b> |
| No                                 | 1                          | 1     | 1                        | 1      | 1     | 1              |
| <b>Feeling of stigmatized</b>      |                            |       |                          |        |       |                |
| Yes                                | -5.25                      | 1.89  | -0.15                    | -8.94  | -1.56 | <b>0.005*</b>  |
| No                                 | 1                          | 1     | 1                        | 1      | 1     | 1              |
| <b>Co morbidity status</b>         |                            |       |                          |        |       |                |
| Yes                                | 1                          | 1     | 1                        | 1      | 1     | 1              |
| No                                 | 6.05                       | 2.18  | 0.16                     | 1.78   | 10.33 | <b>0.006*</b>  |
| <b>Chronic complication status</b> |                            |       |                          |        |       |                |
| Yes                                | 1                          | 1     | 1                        | 1      | 1     | 1              |
| No                                 | 6.04                       | 2.28  | 0.11                     | 1.54   | 10.53 | <b>0.009*</b>  |
| <b>BMI</b>                         | -3.56                      | 1.71  | -0.12                    | -6.94  | -0.18 | <b>0.040*</b>  |
| <b>DM Duration</b>                 | 0.15                       | 1.10  | 0.01                     | -2.02  | 2.33  | 0.89           |
| <b>Types of DM</b>                 |                            |       |                          |        |       |                |
| Type 1                             | 1                          | 1     | 1                        | 1      | 1     | 1              |
| Type 2                             | 4.45                       | 2.39  | 0.12                     | -0.24  | 9.17  | 0.064          |
| <b>Drug regimen</b>                |                            |       |                          |        |       |                |
| Insulin only                       | 1                          | 1     | 1                        | 1      | 1     | 1              |
| OHA                                | -5.66                      | 3.46  | -0.16                    | -12.48 | 1.15  | 0.103          |
| Both                               | -1.42                      | 4.02  | -0.02                    | -9.35  | 6.51  | 0.72           |

Dependent Variable: Overall health related quality of life.

## Discussion

This study aimed to assess the overall health related quality of life with its domains and the predictors among diabetic patients of type I and type II in NSH.

According to this finding, the transformed overall mean score of the HRQoL was found to be moderate. The highest domain mean score was physical functioning. Domains of general health, mental health, bodily pain and vitality had mean score below the average. This result was lower when compared to the study result conducted in Saudi Arabia, Malaysia and Emirati people [17, 30, 34]. This discrepancy might be due to the difference in the socioeconomic status of the patients and the cultural difference across different regions. But it was congruent with the study result from Felege Hiwot Referral Hospital; Ethiopia [26]. This might be because of the possible similarity of the socioeconomic status of the study areas where the study participants shared almost the same life style and cultural perspectives.

The physical and mental component mean score from the current study was comparable with the study from Denmark but higher than the study result reported from Greece [22, 24]. However, another study from Tahrn Hospital indicated that the physical and mental component mean score was relatively higher than that of the present study. The possible explanation for this difference could be the cultural and socio demographic difference of the patients across different study areas. The subjective nature of the HRQoL and the component measurement across different patients might also indicate the differences HRQoL concerns subjective evaluations and also objective descriptors [10, 11].

In this study sex, age, marital status, educational level were among the socio demographic factors that had significant association with the health related quality of life with the diabetic patients. For instance, unable to read and write was inversely associated with the HRQoL indicating that diabetic patients who cannot read and write have lower understanding about the disease, the complication and the treatment as well as unable to make decision on better self care. The study disagreed with the study result from Greece where sex and educational level had not significant association with health related quality of life [10]. This difference could be because of the difference in socio demographic status of the patients.

As age increases the HRQoL of the diabetic patients would be decreased. This report was also noted in similar studies conducted in Greece, and Tehran Hospital, Iran [11, 25]. This might be because of the physiological alteration of the patients as they got older. Older individuals are mostly limited in physical activities, coping up the pain intensity and relief from pain [25]. However, findings from other parts of Ethiopia, South Africa and the Nordic countries were inconsistency with the current study result where age has no association with HRQoL [26,27, 29].

Married diabetic patients had higher HRQoL when compared to the single patients. The finding from the other part of Ethiopia also agreed with the current study result [26]. The possible explanation for this could be because of the married patients might be psychologically stable and have better social interaction in relation to those who are single.

The study identified that there was a gender difference in the mean score of the overall HRQoL. Male diabetic patients had higher HRQoL mean score when compared to the female patients with the highest domain score of

1  
2 physical functioning and lower in general health in both sexes. This goes in line with other literatures indicated that  
3 women got worse HRQoL than males [11, 28]. But it contradicted with other studies conducted in India, Tahrán and  
4 Nordic countries [10, 25, 29]. This discrepancy could be due to the gender impact as most of the time women are  
5 treated inferiorly. They are less autonomous in giving decision on behalf of their rights.  
6  
7

8 Occupation and economic status were not found to be significantly associated with HRQoL of diabetic patients in  
9 this study. But, the finding from the same country, Ethiopia, identified as occupation was predictor for HRQoL of  
10 diabetic patients [26]. Another study also showed that economic status has significant association [12]. The  
11 discrepancy could be due to the methodological difference. Even though the patients share almost similar  
12 socioeconomic status, the previous studies analyzed the economic status just from mean annual income of the  
13 patients. However, since the patients' way of disclosing their income level might not be accurate especially for rural  
14 residents, mean annual income might not be better way to forward conclusion. In this study, wealth index was  
15 computed.  
16  
17  
18  
19

20 In this study, patients who had history of smoking had decreased HRQoL when compared to their counter parts.  
21 This result was supported by the report from CDC and study from United States that indicated the direct impact of  
22 smoking altering the health condition of the diabetic patients and reduced their HRQoL [15, 31]. Smokers have more  
23 likely to have central fat accumulation than non-smokers, and smoking is known to induce insulin resistance and  
24 compensatory insulin secretion responses, which could explain the increased risk of diabetes in those who smoke  
25 [22]. But, it was not congruent with the study from South Africa where no association between cigarette smoking  
26 and HRQoL of diabetic patients were declared [27, 33]. This could likely be because of the effect of the sample size.  
27  
28  
29

30 Both co morbidity condition and chronic complication related to diabetic was found to affect the HRQoL status  
31 which was similar with different studies conducted so far in Singapore, Arab Emirates, Saudi Arabia and Ethiopia  
32 [6, 17, 23, 26, 32]. This could be due to the fact that co morbid conditions which in this study like hypertension is  
33 another challenging that could put the patients in worrying conditions. Patients might seek health care for both or  
34 above diseases in which case they were emotionally diseased, the role due to emotional problem might be under  
35 question. All the domains of HRQoL directly or indirectly would be affected. In another way, those who developed  
36 chronic complications were also live under the double crisis. In one way, they felt unhappy of being diabetic patient  
37 and in other way they would be under the psychological, physical, emotional, social and spiritual agony.  
38  
39  
40  
41  
42

43 However, in Greece presence of complications of diabetes mellitus had no significant association with HRQoL of  
44 patients which is different from the current study finding [11]. This might be due to the difference in better access to  
45 care in the management of diabetes patients.  
46  
47

48 In this study, the increase in BMI affected HRQoL negatively. But in South Africa and Greece there was no  
49 significant association between BMI and HRQoL [11, 27]. This discrepancy could be due to the difference in the  
50 diabetic patients' knowledge gap and practice regarding their life style modification.  
51  
52

53 Feeling of stigmatized of being diabetic patient inversely associated with HRQoL. This result goes in line with other  
54 literatures [18]. Because the diabetic patients are living under multiple restrictions, they would likely feel  
55 stigmatized in all aspects of their life. They are often restricted with regard to the amount, type and timing of food  
56  
57  
58  
59  
60

1  
2 consumed. For example, eating mandatory foods at certain times, waiting for insulin to take effect before eating,  
3 etc. These restrictions may negatively affect an individual's HRQoL and their interaction with people around them,  
4 in their social lives and in the work place.  
5

6  
7 The study had several limitations that have to be put in to consideration when used by other researchers. Since the  
8 study was a cross sectional study design, it is difficult to infer the cause effect relationship (temporal relation). The  
9 study was facility based which could not be generalized to all diabetic patients remained in the community. Face-to-  
10 face interview was conducted by considering the different level of education of the participants, which might lead to  
11 the social desirability bias and could overestimate the result. The effect of recall bias cannot be ruled out. The health  
12 care providers view towards the health related quality of life was not assessed.  
13  
14  
15

16 In conclusion, the present study identified that the HRQoL of diabetic patients on follow up at NSH was moderate.  
17 Domains of general health, mental health, bodily pain and vitality were the most affected domains among the  
18 diabetic patients. Sex, age, education status, marital status, history of smoking status, BMI, feeling of stigma status,  
19 co morbidity status and diabetic related chronic complication status were predictors of health related quality of life  
20 identified in this study.  
21  
22  
23

24 However, residence, economic status, occupation, type of diabetes, drug regimen and DM duration were not  
25 statistically significant predictors of health related quality of life.  
26

27 There are several avenues for further researches based on the current finding. Longitudinal studies with larger  
28 sample size needs to be conducted in order to generalize the overall health related quality of life of diabetic patients  
29 at national level. Moreover, experimental and qualitative study design needs to be considered focusing the life style  
30 modification of the diabetic patients.  
31  
32  
33

#### 34 **Compliance with ethical standards**

35 **Funding:** This work was financially supported by Wollega University with grant number WU/RD/256/2011.

36 **Conflict of interest:** All authors declare that they have no conflict of interest.

37 **Ethical approval:** The study received letter of approval from Research Ethics Review Committee (RERC) of  
38 Wollega University, DPH/0081/2011.  
39

40 **Informed consent:** Informed consent was obtained from all individual participants involved in the study.  
41

42 **Authors' contributions:** All authors were contributed from the conception of the study to the final draft of the  
43 manuscript. Material preparation, data collection, analysis and interpretation of the result were carried out by Bikila  
44 Regassa, Mekdes Tigistu and Belachew Etana. The first draft of the manuscript was written by BR and reviewed by  
45 MT and BE. All authors read and approved the final manuscript.  
46  
47  
48  
49  
50  
51  
52  
53  
54  
55  
56  
57  
58  
59  
60

## References

1. American Diabetes Association (2002). Standards of Medical Care for Patients. 25(1):s33–49.
2. Center for disease control and prevention. National Diabetes Fact Sheet , 2008.
3. Trikkalinou A, Papazafiropoulou AK MA.(2017). World Journal of Diabetes. *Diabetol Metab Syndr*.8(4):120–71.
4. International Diabetes Federation. IDF Diabetes Atlas (2015): Global estimates of diabetes prevalence for 2017 and projections for 2045. *Diabetology & Metabolic Syndrome. Elsevier B.V.* Available from: <https://doi.org/10.1016/j.diabres.2018.02.023>.
5. International Diabetes Federation. IDF DIABETES ATLAS. 2015.
6. Al-shehri AH, Taha AZ, Bahnassy AA, Salah M. (2008). Health-related quality of life in type 2 diabetic patients. 25(5):352–60.
7. Kebede D, Alem A, Shibire T, Deyessa N.(204). Health related quality of life ( SF-36 ) survey in Butajira , rural Ethiopia : Normative data and evaluation of reliability and validity. 289–97.
8. Dinesh Khanna JT. (2007). Health-related Quality of Life- An Introduction. *Am J Manag Care*, 13(9):218–23.
9. Goli M, Salarvand S, Dehvan F, Ghafouri H, Dalvand S. (2018). Health-Related Quality of Life in Iranian Patients with Thalassemia Major : A Systematic Review and Meta-Analysis, 6(59):8483–94.
10. Sreedevi A, Cherkil S, Kuttikattu DS, Kamalamma L, Oldenburg B. (2016). Validation of WHOQOL-BREF in Malayalam and Determinants of Quality of Life Among People With Type 2 Diabetes in Kerala , India, 28(1s):62S–69S.
11. Athanasia K. Papazafiropoulou, Florentia Bakomitrou, Aikaterini Trikallinou et al.(2018). Diabetes-dependent quality of life ( ADDQOL ) and affecting factors in patients with diabetes mellitus type 2 in Greece. *BioMed Central*,10(23):4–9.
12. Hayek AA Al, Robert AA, Saeed A Al, Alzaid AA, Sabaan FS Al.(2014). Factors Associated with Health-Related Quality of Life among Saudi Patients with Type 2 Diabetes Mellitus : A Cross-Sectional Survey, 38:220–9.
13. Anderson BJ, Laffel LM, Domenger C, Danne T, Phillip M, Mazza C, et al.(2017). Factors Associated With Diabetes- Specific Health-Related Quality of Life in Youth With Type 1 Diabetes : The Global TEENS Study, 40:1002–9.
14. James P. Boyle, Amanda A. Honeycutt, K.M Venkat Narayan,Thomas J.Hoerger,Linda S.Geiss, Homg Chen, et al. (2001). Projection of Diabetes Burden Through 2050. *Diabetes Care*, 24(11):1936–40.
15. Center for control and Prevention of diseases. Smoking and diabetes, (2014). Available from:[https://www.cdc.gov/tobacco/data\\_statistics/sgr/50th-anniversary/pdfs/fs\\_smoking\\_diabetes\\_508.pdf](https://www.cdc.gov/tobacco/data_statistics/sgr/50th-anniversary/pdfs/fs_smoking_diabetes_508.pdf). [cited 28Mar, 2019]
16. Bommer C, Sagalova V, Heesemann E, Manne-goehler J, Atun R.(2015). Global Economic Burden of Diabetes in Adults : Projections From 2015 to 2030, 41:963–70.
17. Anne-Marie L Wegeberg, Theresa Meldgaard, Sofie Hyldahl et al.(2019). Physical and psychological health domains of quality of life in type 2 diabetic patients in relation to clinical factors of diabetes mellitus

- 1  
2 in Egypt, 10(2):87–95.
- 3  
4 18. Gredig D, Bartelsen-raemy A.(2017). Diabetes-related stigma affects the quality of life of people living  
5 with diabetes mellitus in Switzerland : implications for healthcare providers, 25(5):1620–33.
- 6  
7 19. Chen HCLZX.(2017). Effect of exercise on the quality of life in type 2 diabetes mellitus: a systematic  
8 review. *Diabetol Metab Syndr*,26(3):515–30.
- 9  
10 20. Porojan M, Poantă L, Fodor D.(2009). Health-Related Quality of Life of Diabetic Patients, 47(4):409–13.
- 11  
12 21. FMOH. Ethiopian National Guideline on Major NCDs (2016). Guidelines on Clinical and Programmatic  
13 Management of Major Non Communicable Diseases. *Diabetology & Metabolic Syndrome*.
- 14  
15 22. Zheng Y, Ley SH, Hu FB.(2017) Global aetiology and epidemiology of type 2 diabetes mellitus and its  
16 complications. *Nature Publishing Group*,14(2):88–98.
- 17  
18 23. Venkataraman K, Tai ES, Tock T, Hospital S, Teck K, Hospital P.(2013). Associations between  
19 complications and health-related quality of life in individuals with diabetes, 78:865–73.
- 20  
21 24. Wegeberg AL, Meldgaard T, Hyldahl S, Jakobsen PE, Drewes AM, Brock B, et al.(2019). Quantities of  
22 comorbidities affects physical, but not mental health related quality of life in type 1 diabetes with confirmed  
23 polyneuropathy, 10(2):87–95.
- 24  
25 25. Kakhki AD, Abed Z.(2013). Health-Related Quality of Life of Diabetic Patients in Tehran, 11(4):1–6.
- 26  
27 26. Reba K, Argaw Z, Bizuayehu Wale, Hordofa Gutema.(2018). Health related quality of life of patients with  
28 diagnosed type 2 diabetes in Felege Hiwot Referral Hospital , North West Ethiopia : a cross sectional study.  
29 *BioMed Central*,10(23):4–9.
- 30  
31 27. R Daya, Zbayat FJR.(2018). Effects of diabetes mellitus on health-related quality of life at a tertiary  
32 hospital in South Africa : A cross-sectional study. *Diabetol Metab Syndr*,10(23):918–28.
- 33  
34 28. Core MA Del, Ahn J, Wukich DK, Liu GT, Lalli T, Vanpelt MD, et al. (2018). Gender Differences on SF-  
35 36 Patient-Reported Outcomes of Diabetic Foot Disease, 1–7.
- 36  
37 29. Wändell PE.(2018). Quality of life of patients with diabetes mellitus An overview of research in primary health  
38 care in the Nordic countries. *Diabetol Metab Syndr*,10(23).
- 39  
40 30. Wasif Gillani, Irfan Altaf Ansari, Hisham A. Zaghoul et al.(2018). Bridging glycated hemoglobin with  
41 quality of life and health state ; a randomized case – control study among type 2 diabetes patients. *BioMed  
42 Central*,10(23):1–10.
- 43  
44 31. Qin W, Blanchette JE, Murrock C.(2019). Exploring the Relationship Between Lifestyle Behaviors and  
45 Health-Related Quality of Life Among Older Adults With Diabetes, 45(1):96–104.
- 46  
47 32. Muze M, Hailu E, Woldemichael K, Fekecha B et al.(2018). Health Related Quality of Life And its  
48 Associated Factors Among Diabetic Patients Attending Diabetes Clinic in Jimma University Teaching  
49 Hospital. *Diabetol Metab Syndr*,10(23):7–11.
- 50  
51 33. Tang TS, Funnell MM, Anderson RM.(2008). Social Support , Quality of Life , and Self-Care Behaviors  
52 Among African Americans With Type 2 Diabetes, 34(2).
- 53  
54  
55  
56  
57  
58  
59  
60



## Annexes

Table showing correlation matrix of the eight domains among *diabetic patients on follow up at NSH, East Wollega , West Ethiopia, 15th April -5th June, 2019,(n=215)*

| <b>Correlation Matrix</b> |       |       |       |       |       |       |       |       |               |
|---------------------------|-------|-------|-------|-------|-------|-------|-------|-------|---------------|
|                           | PF    | RP    | VT    | MH    | BP    | GH    | RE    | SF    | Overall HRQoL |
| PF                        | 1.000 |       |       |       |       |       |       |       |               |
| RP                        | .631  | 1.000 |       |       |       |       |       |       |               |
| VT                        | .089  | .127  | 1.000 |       |       |       |       |       |               |
| MH                        | .125  | .208  | .294  | 1.000 |       |       |       |       |               |
| BP                        | .043  | .092  | -.018 | -.002 | 1.000 |       |       |       |               |
| GH                        | .455  | .511  | .133  | .113  | -.030 | 1.000 |       |       |               |
| RE                        | .380  | .683  | .071  | .191  | .034  | .274  | 1.000 |       |               |
| SF                        | .590  | .640  | .166  | .276  | .042  | .549  | .327  | 1.000 |               |
| Overall HRQoL             | .763  | .916  | .207  | .301  | .128  | .637  | .747  | .765  | 1.000         |

# BMJ Open

## Predictors of health-related quality of life among diabetic patients on follow up at Nekemte Specialized Hospital, Western Ethiopia: A cross sectional study

|                                 |                                                                                                                                                                                                                                                                                                           |
|---------------------------------|-----------------------------------------------------------------------------------------------------------------------------------------------------------------------------------------------------------------------------------------------------------------------------------------------------------|
| Journal:                        | <i>BMJ Open</i>                                                                                                                                                                                                                                                                                           |
| Manuscript ID                   | bmjopen-2019-036106.R1                                                                                                                                                                                                                                                                                    |
| Article Type:                   | Original research                                                                                                                                                                                                                                                                                         |
| Date Submitted by the Author:   | 22-Feb-2020                                                                                                                                                                                                                                                                                               |
| Complete List of Authors:       | Feyisa, Bikila Regassa; Wollega University, Department of Public Health, Institute of Health Sciences<br>Yilma, Mekdes; Wollega University, Department of Public Health, Institute of Health Sciences<br>Tolessa, Belachew; Wollega University, Department of Public Health, Institute of Health Sciences |
| <b>Primary Subject Heading</b>: | Diabetes and endocrinology                                                                                                                                                                                                                                                                                |
| Secondary Subject Heading:      | Public health, Diabetes and endocrinology, Patient-centred medicine, Renal medicine                                                                                                                                                                                                                       |
| Keywords:                       | DIABETES & ENDOCRINOLOGY, Diabetic nephropathy & vascular disease < DIABETES & ENDOCRINOLOGY, Diabetic neuropathy < DIABETES & ENDOCRINOLOGY, Diabetic retinopathy < DIABETES & ENDOCRINOLOGY                                                                                                             |
|                                 |                                                                                                                                                                                                                                                                                                           |

SCHOLARONE™  
Manuscripts

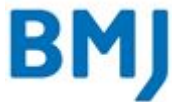

I, the Submitting Author has the right to grant and does grant on behalf of all authors of the Work (as defined in the below author licence), an exclusive licence and/or a non-exclusive licence for contributions from authors who are: i) UK Crown employees; ii) where BMJ has agreed a CC-BY licence shall apply, and/or iii) in accordance with the terms applicable for US Federal Government officers or employees acting as part of their official duties; on a worldwide, perpetual, irrevocable, royalty-free basis to BMJ Publishing Group Ltd ("BMJ") its licensees and where the relevant Journal is co-owned by BMJ to the co-owners of the Journal, to publish the Work in this journal and any other BMJ products and to exploit all rights, as set out in our [licence](#).

The Submitting Author accepts and understands that any supply made under these terms is made by BMJ to the Submitting Author unless you are acting as an employee on behalf of your employer or a postgraduate student of an affiliated institution which is paying any applicable article publishing charge ("APC") for Open Access articles. Where the Submitting Author wishes to make the Work available on an Open Access basis (and intends to pay the relevant APC), the terms of reuse of such Open Access shall be governed by a Creative Commons licence – details of these licences and which [Creative Commons](#) licence will apply to this Work are set out in our licence referred to above.

Other than as permitted in any relevant BMJ Author's Self Archiving Policies, I confirm this Work has not been accepted for publication elsewhere, is not being considered for publication elsewhere and does not duplicate material already published. I confirm all authors consent to publication of this Work and authorise the granting of this licence.

1  
2  
3  
4 **Predictors of health-related quality of life among diabetic patients on follow up at Nekemte**  
5 **Specialized Hospital, Western Ethiopia: A cross sectional study**  
6 **Bikila Regassa Feyisa\*<sup>1</sup>, Mekdes Tigistu Yilma<sup>1</sup>, Belachew Etana Tolessa<sup>1</sup>**  
7  
8  
9

10  
11  
12 **Corresponding author**  
13

14 **Bikila Regassa Feyisa**, Department of Public Health, Institute of Health Sciences, Wollega  
15 University, Nekemte, Ethiopia, P.O. Box: 395  
16

17  
18 Tell: (+251)9 27488235  
19

20  
21 Email: [bikregasa@gmail.com](mailto:bikregasa@gmail.com), ORCID ID: 0000-0002-7191-0218  
22

23  
24 **Affiliation:** <sup>1</sup> Department of Public health, Institute of Health Sciences, Wollega University,  
25 Ethiopia, P.O. Box: 395  
26

27 MT:[mekdestigistu10@gmail.com](mailto:mekdestigistu10@gmail.com); ORCID ID: 00 00000216246529  
28

29  
30 BE:[ba.etana@gmail.com](mailto:ba.etana@gmail.com); ORCID ID: 0000-0001-9296-2095  
31  
32  
33  
34  
35  
36  
37  
38  
39  
40  
41  
42  
43  
44  
45  
46  
47  
48  
49  
50  
51  
52  
53  
54  
55  
56  
57  
58  
59  
60

## Abstract

**Objective:** To assess health-related quality of life (HRQoL) and its predictors among diabetic patients on follow up at Nekemte Specialized Hospital (NSH) in Western Ethiopia.

**Design, setting and participants:** This facility based cross sectional study was conducted among 224 patients with diabetes mellitus (types I and II) on follow up at one of the public hospitals in western Ethiopia. Respondents were selected by systematic random sampling and interviewed with the aid of a structured questionnaire.

**Main outcome measured:** HRQoL was measured by using the Medical outcomes study (MOS) 36-item Short Form (SF-36) Health Survey from 15<sup>th</sup> April to 5<sup>th</sup> June, 2019. Structured questionnaire was used for the data collection from participants selected by systematic random sampling. Multiple linear regression was used for final model.

**Result:** A total of 215 diabetic patients consented and completed the study, giving a response rate of 96%. The mean score of the overall HRQoL of the study participants was  $50.3 \pm 18.1$ . The highest mean score was obtained in the physical functioning domain and the lowest mean score in general health domain. Age, education status, history of smoking, feeling of stigmatized and Body mass index (BMI) were inversely associated with the overall HRQoL. Gender (male), marital status (currently married), absence of co morbidity and absence of chronic complications related to diabetes mellitus were positively associated with overall HRQoL.

**Conclusion:** The overall HRQoL of diabetic patients on follow up at the study area was found to be moderate. General health, mental health, bodily pain and vitality were the most affected domains. Both the mental and physical components need to be considered when caring the diabetic patients on follow up beyond provision of treatment.

**Key words:** diabetic patients, health related quality of life, Nekemte

## Strength and limitations of this study

- To the best of the authors' knowledge, the study was the first to explore the predictors of health-related quality of life (HRQoL) among patients with types I and II diabetes mellitus in Ethiopia.
- We used an established tool with good psychometric properties.
- No comparison was made between types I and II diabetes mellitus.
- The study was cross sectional design that could make the result of the study difficult to identify either the cause or the effect happened first.

## Introduction

Diabetes Mellitus (DM) refers to a group of common metabolic disorder that shares the phenotype of hyperglycemia. Several distinct types of DM exist and are caused by complex interaction of genetics and environmental factors. The two broad categories of DM are designated as type I and type II DM. It is characterized by chronic high blood glucose level ( $>126$  mg/dl for fasting blood sugar and /or a 2-hour postprandial glucose of  $\geq 200$  mg/dl or if the individual had symptoms of diabetes and a random plasma glucose  $\geq 200$  mg/dl (confirmed by repeat testing) [1-3].

Diabetes mellitus is becoming a growing problem that has significant impact on health status and quality of life. It is considered an urgent public health problem, which can influence the HRQoL negatively [2, 3].

1  
2 Worldwide, 8.8 % of adults aged 20-79 years had diabetes in 2015 which was projected to reach 366 million in 2030  
3 and 642 million (one in ten adults) by 2040, among which about 75% lived in low- and middle-income countries.  
4 Globally about 5 million deaths among those aged 20-99 years were attributable to diabetes [4-7].  
5

6  
7 There is now a consensus that the health of general population cannot be well characterized from the analyses of  
8 mortality and morbidity statistics alone and that there is also a need to consider health in terms of people's  
9 assessment of their sense of wellbeing and ability to perform social roles [7-9].  
10

11 Health-related quality of life (HRQoL) is a multidimensional concept that focuses on the impact of illness and  
12 treatment on patients, and it can measure patients' perceptions of illness and treatment, their perceived needs for  
13 healthcare providers and their preferences for treatment and outcomes of the disease [10].  
14  
15

16 Health related quality of life concerns both subjective and objective measurements of the individuals. It has been  
17 defined as "an overall general well-being that comprises objective descriptors and subjective evaluations of physical,  
18 material, social, and emotional well-being together with the extent of personal development and purposeful activity,  
19 all weighted by a personal set of values [11].  
20  
21

22 Diabetes Mellitus negatively influences HRQoL. This negative influence affects many aspects of a person's life,  
23 including the psychological impact of being chronically ill, dietary restrictions, changes in social life, symptoms of  
24 inadequate metabolic system, chronic complications and in due course lifelong infirmities [12-15].  
25  
26

27 Studies have indicated that the HRQoL of patients with DM is decreased by different domains of HRQoL such as  
28 role limitation due to the disease, emotional disturbances, pain, and fatigability. Other different factors related to  
29 HRQoL among diabetic patients also affect both quality and quantity of life of patients with DM. These are socio  
30 demographics and economic status, behavioral, clinical and social related factors [16, 17].  
31  
32

33 Diabetes mellitus permanently changes the patient's life style. Daily self-care, consisting of daily insulin injection or  
34 oral anti diabetic agents, self-monitoring of blood glucose and diabetic recommended diet has an impact on HRQoL.  
35 Moreover, the acute and chronic complications which might develop in due course affect the patients HRQoL [18,  
36 19].  
37  
38  
39

40 In Ethiopia, even though programs have been launched regarding the chronic diseases management, prevention,  
41 screening, diagnosis, treatment and care, little is emphasized on factors that affect the HRQoL among the patients.  
42 The Ethiopian National Guideline on Major NCDs lacks the specific areas of HRQoL dimension which is affected  
43 by the disease. The existing articles and reviews have tried to indicate the epidemiology, complications, therapies,  
44 comparisons of treatments and health strategies but the data regarding predictors of HRQoL and how much it is  
45 actually affected by the condition is scarce [20].  
46  
47  
48

49 Therefore, the study was designed to predict the level of health related quality of life and factors associated with it  
50 among diabetic patients in Nekemte Specialized Hospital.  
51  
52  
53  
54  
55  
56  
57  
58  
59  
60

## Research Design and Method

### Study Design and setting

Facility based cross sectional study design was employed from 15<sup>th</sup> April to 5<sup>th</sup> June, 2019. The study was conducted among diabetic patients on follow up at Nekemte Specialized Hospital (NSH) which is found in Nekemte City and located to Western Ethiopia which is 331 km away from the capital city of Ethiopia, Addis Ababa.

Diabetic follow up and care services started separately as chronic diseases clinic at the Hospital in 2010 with 96 cases. According to the unpublished report of NSH on the 1<sup>st</sup>February, 2019, 591 diabetic patients of both types I and II were on follow up at the chronic disease clinic.

### Eligibility criteria

All known DM patients of type I and type II who have been on follow up for at least one year duration and age greater than 18 years at NSH were included while diabetic patients of both types who could not respond to the interview because of very serious illness were excluded from the study.

### Sample size and sampling procedure

The sample size was determined assuming a normally distributed independent means. The overall mean score of the HRQoL from the published study in Ethiopia [21] was used to calculate the sample size for the first objective. Sample size for the second objectives was calculated using the mean of the independent variables from different studies. Then, all the calculated sample sizes were compared for the maximum value with assumption of 95% CI ( $Z_{\alpha/2}=1.96$ ) and 5% marginal error. After calculating correction formula and adding 5% non response rate, the final sample size became 224.

Systematic random sampling was used to select the study participants. The sampling interval was calculated by dividing the total number of diabetic patients on follow up as counted from the registries by the calculated sample size.

### Data collection procedure

Data was collected using interviewer administered structured questionnaire which was adopted from the MOS 36-item short form (SF-36) health survey. The English version of the questionnaire was translated to Afaan Oromoo (the local language) and translated back to English by other language experts to check its consistency. We recruited and trained four BSc nurse data collectors and one experienced MPH professional supervisor for data collection process.

### Instruments

The instrument consists of the WHO SF-36 item questionnaires adopted from MOS 36-SF instrument [22] and socio demographic and economic profiles. The SF-36 items consists of 36 questions containing physical functioning (10 items), role limitation due to physical health (4 items), body pain (2 items), vitality (4 items), social functioning (2 items), role limitation due to emotional problem (3 items), mental health (5 items) and general health (6 items).

## Data processing analysis

Each item of SF-36 was scored on linear scale and the negatively worded questions were inversely coded before any attempt of analysis. The score of each domain was obtained by summation of the corresponding items. The scores were then be linearly transformed on 0-100 scale. Mean scores were then be adjusted to make the domain scores comparable with the scores used in the MOS (0-100) (Lower scores denote lower quality of life).

Aggregate component scores were calculated by principal component factor analysis (PCA) after all eight domain scores were checked. All assumptions were checked prior to run PCA. Components with Eigen-value greater than 1 were retained for further analysis. The factors loadings above 0.4 was taken and included in the result. The retained factors were orthogonally rotated. Finally, two summary scores (subscales), physical component score (PCS) and mental component score (MCS), were derived from PCA.

Dummy variables were created for categorical variables that have more than two categories like marital status, educational status, age category and the drug regimen.

For the internal consistency reliability of the SF-36 items, Cronbach's alpha was checked and found to be 0.876 which was in the acceptable level.

Beta ( $\beta$ -Coefficient) was used to interpret the strength of predictors of HRQoL. The degree of association between pairs of variables was measured by Pearson's correlation coefficient ( $r$ ). The independent variables at  $P < 0.05$  were considered as statistically significant. Multicollinearity was checked using variance inflation factors (VIFs). The maximum value for VIF was 2.3.

## Patient and Public involvement

Patients were not involved in the study

## Results

### Socio demographic characteristics

A total of 215 diabetic patients on follow up at NSH were included in the analysis with response rate of 96%. Among the total respondents, 122 (56.7%) of them were males and the mean age of all the respondents was  $41.6 \pm 15.4$  years and majority, 141 (65.6%) of them were resident in urban area. Regarding the marital status, more than two-thirds, 146 (67.9%) of the total respondents were married among which males accounted for 58.9%% and majority, 198 (92.1%) of them were Oromo. The mean family size of the respondents was  $4.83 \pm 1.5$  years. Thirty eight (17.7%) of the study participants could not read and write and only 52 (24.2%) of them were employed either at government and/or nongovernmental organizations (**Table 1**).



Table 1: Socio demographic and socio economic characteristics of diabetic patients on follow up at NSH, Nekemte, East Wollega, West Ethiopia, (n=215).

| Variables                             | Frequency (n=215)   | Percentage |
|---------------------------------------|---------------------|------------|
| <b>Sex</b>                            |                     |            |
| Male                                  | 122                 | 56.7       |
| Female                                | 93                  | 43.3       |
| <b>Mean age in year</b>               | 41.60 ( ± SD 15.42) |            |
| <b>Residence</b>                      |                     |            |
| Urban                                 | 141                 | 65.6       |
| Rural                                 | 74                  | 34.4       |
| <b>Marital status</b>                 |                     |            |
| Married                               | 146                 | 67.9       |
| Single                                | 42                  | 19.5       |
| Divorced                              | 6                   | 2.8        |
| Widowed                               | 21                  | 9.8        |
| <b>Ethnicity</b>                      |                     |            |
| Oromo                                 | 198                 | 92.1       |
| Amhara                                | 9                   | 4.2        |
| Guraghe                               | 5                   | 2.3        |
| Other <sup>a</sup>                    | 3                   | 1.4        |
| <b>Educational status</b>             |                     |            |
| Cannot read and write                 | 38                  | 17.7       |
| Grade 1-8                             | 63                  | 29.3       |
| Grade 9-12                            | 50                  | 23.3       |
| College/University                    | 64                  | 29.8       |
| <b>Occupation</b>                     |                     |            |
| Government/NGO employee               | 52                  | 24.2       |
| Merchant                              | 23                  | 10.7       |
| Farmer                                | 41                  | 19.1       |
| Housewife                             | 46                  | 21.4       |
| Retired                               | 23                  | 10.7       |
| Other <sup>b</sup>                    | 30                  | 14         |
| <b>Economic status (Wealth index)</b> |                     |            |
| Poorest                               | 43                  | 20         |
| Poor                                  | 38                  | 17.7       |
| Medium                                | 46                  | 21.4       |
| Wealthy                               | 45                  | 20.9       |
| Wealthiest                            | 43                  | 20         |

<sup>a</sup>Other (Tigre, Silte)    <sup>b</sup>Other (Student, carpenter)

### Medical history and health condition

More than half, 125 (58.1%) of the study participants had type 2 diabetes mellitus. Almost half, 108 (50.2%) of them had been diagnosed within last five years. Regarding treatment, 99 (46%) of the patients were using only insulin while 93 (43.3%) and 23 (10.7%) were using oral hypoglycemic agents and both insulin and oral hypoglycemic agents respectively.

Nearly half, 103 (47.9%) of the study participants were co morbid and hypertension accounted for 85 (82.5%) of co-morbid conditions. Sixty three (29.3%) of the study participants had diabetes-related acute complications which

1 included DKA, 40 (63.5%), Hypoglycemia 20 (31.7%) and non ketotic hyperosmolar state 3(4.8%) respectively.  
 2 Sixty nine of the study subjects had diabetes related chronic complications which accounted around 32.1% where  
 3 diabetic neuropathy (including foot ulcer, peripheral pain, and gangrene) covered almost half, 49.3% as illustrated  
 4 in table 2.  
 5  
 6

7 Table 2: Medical history and health condition of diabetic patients on follow up at NSH, Nekemte, East Wollega,  
 8 West Ethiopia, (n=215).  
 9

| Variable                                                 | Frequency (n) | Percent (%) |
|----------------------------------------------------------|---------------|-------------|
| <b>Duration of DM (years)</b>                            |               |             |
| <5                                                       | 108           | 50.20       |
| 6-10                                                     | 59            | 27.40       |
| 11-15                                                    | 32            | 14.90       |
| >15                                                      | 16            | 7.40        |
| <b>Drug regimen</b>                                      |               |             |
| Insulin only                                             | 99            | 46          |
| Oral hypoglycemic agents                                 | 93            | 43.3        |
| Insulin and oral hypoglycemic agents                     | 23            | 10.7        |
| <b>Presence of co morbidity</b>                          |               |             |
| Yes                                                      | 103           | 47.9        |
| No                                                       | 112           | 52.1        |
| <b>Presence of diabetic related chronic complication</b> |               |             |
| Yes                                                      | 69            | 32.1        |
| No                                                       | 146           | 67.9        |
| <b>Types of acute complications</b>                      |               |             |
| DKA                                                      | 40            | 63.5        |
| Hypoglycemia                                             | 20            | 31.7        |
| Non ketotic hyperosmolar state                           | 3             | 4.8         |
| <b>Type of chronic complication</b>                      |               |             |
| Diabetic neuropathy                                      | 34            | 49.30       |
| Diabetic Retinopathy                                     | 19            | 27.50       |
| Diabetic nephropathy                                     | 14            | 20.30       |
| Other                                                    | 2             | 2.90        |
| <b>Body mass index (BMI) (kg/m<sup>2</sup>)</b>          |               |             |
| <18.5                                                    | 5             | 2.30        |
| 18.5-25                                                  | 122           | 56.70       |
| 25-30                                                    | 80            | 37.20       |
| >30                                                      | 8             | 3.7         |

### Health related quality of life of the study participants

45 The transformed mean score of the overall HRQoL of the study participants was found to be  $50.3 \pm 18.1$  with the  
 46 minimum and maximum score of 16.4 and 79.1 respectively. Among the eight domains of HRQoL, the study  
 47 participants scored highest ( $63.1 \pm 34.3$ ) mean score in physical functioning and lowest ( $30.2 \pm 22.9$ ) mean score in  
 48 general health domain. When analyzing the HRQoL by domains general health, mental health, bodily pain and  
 49 vitality had mean score below 50 indicating that they were the most affected domains among the diabetic patients  
 50 (Table 3).  
 51  
 52  
 53  
 54  
 55  
 56  
 57

Two component scores of the HRQoL was generated by PCA with the total variance explained 66.8%. Physical functioning, Role physical, general health and bodily pain dimension scales correlates most highly with physical component of HRQoL. Moreover, the mental health component of HRQoL correlates most highly with mental health, social functioning role emotional and vitality (**Annex I and II**). The higher mean score was found for the mental component score ( $51.8 \pm 16.7$ ) with the maximum score of 80.8.

Table 3 : The eight domains of HRQoL, the overall HRQoL and the two component scores of HRQoL with their mean score of diabetic patients at NSH, East Wollega , West Ethiopia, (n=215).

| <b>Domains of HRQoL, Overall HRQoL, PCS and MCS</b> | <b>Mean</b> | <b>SD</b> | <b>Minimum score (%)</b> | <b>Maximum score (%)</b> |
|-----------------------------------------------------|-------------|-----------|--------------------------|--------------------------|
| Physical Functioning (PF)                           | 63.2        | 34.4      | 14.4                     | 97.6                     |
| Role limitation due to physical health (RP)         | 53.4        | 44.8      | 8.6                      | 98.2                     |
| Role limitation due to emotional problem (RE)       | 52.77       | 45.8      | 6.97                     | 98.6                     |
| Energy/Fatigue (Vitality)                           | 48.5        | 7.8       | 20                       | 75                       |
| Emotional wellbeing (MH)                            | 49.8        | 8.0       | 20                       | 72                       |
| Social Functioning (SF)                             | 56.0        | 30.1      | 12.9                     | 86                       |
| Bodily Pain (BP)                                    | 48.6        | 11        | 12.5                     | 80                       |
| General Health (GH)                                 | 30.2        | 22.9      | 7.3                      | 95                       |
| Overall HRQoL                                       | 50.3        | 18.1      | 16.4                     | 79.1                     |
| Physical Component Score (PCS)                      | 48.8        | 21.9      | 10                       | 87.5                     |
| Mental Component Score (MCS)                        | 51.8        | 16.7      | 19.8                     | 80.8                     |

### **Predictors of health related quality of life of diabetic patients**

The multiple linear regression model indicated that a unit increase in age would likely decrease health related quality of life of diabetic patients by 0.25 ( $\beta=-0.25$ , 95% CI, -0.43-0.07,  $p=0.007$ ) controlling all other independent variables.

Males had about five times better HRQoL when compared to their counter parts ( $\beta=5.23$ , 95% CI, 1.10-9.36,  $p=0.013$ ). As for marital status, those who married had about five times better HRQoL when compared to those who were single controlling for all other independent variables ( $\beta=5.30$ , 95% CI, 1.88-10.52.  $P=0.04$ ).

Regarding the educational level the respondents achieved, those who were unable to read and write were about 9 times lower HRQoL ( $\beta=-8.81$ , 95% CI, -14.88 to -2.82,  $P=0.004$ ) when compared to those who achieved college and above after controlling all other predictors.

History of smoking was found to affect the HRQoL status of the diabetic patients. Diabetic patients who had history of smoking had nine units times lower HRQoL ( $\beta=-9.03$ , 95% CI, -15.23- -4.69,  $P<0.001$ ) when compared to their

counter parts. In the same way, feeling of stigmatized because of being diabetic patient would likely decrease HRQoL by 5.25 units ( $\beta=-5.25$ , 95% CI, -8.94 to -1.56,  $P=0.005$ ) compared to their counterparts.

Absence of co morbid conditions and chronic complications related with diabetes mellitus was found to increase HRQoL when compared to their counter parts. In both cases, those who had not the condition had about six units better HRQoL than their counterparts. As for BMI, the increase in one unit of BMI would likely decrease the HRQoL by 3.56 units ( $\beta=-3.56$ , 95% CI, -6.94- -0.18,  $P=0.009$ ) **Table 4**

Table 4: Multiple linear regression analysis of diabetic patients on follow up at NSH, East Wollega , West Ethiopia, (n=215)

| Variables                          | Unstandardized |       | Standardized<br>Coefficient | 95% CI |       | P-value        |
|------------------------------------|----------------|-------|-----------------------------|--------|-------|----------------|
|                                    | Coefficient    | SE    |                             | Lower  | Upper |                |
| <b>(Constant)</b>                  | 69.41          | 10.31 |                             | 49.16  | 89.74 | 0.000          |
| <b>Sex</b>                         |                |       |                             |        |       |                |
| Female                             | 1              | 1     | 1                           | 1      | 1     | 1              |
| Male                               | 5.23           | 2.11  | 0.14                        | 1.10   | 9.36  | <b>0.013*</b>  |
| <b>Age</b>                         | -0.25          | 0.08  | -0.20                       | -0.43  | -0.07 | <b>0.007*</b>  |
| <b>Marital status</b>              |                |       |                             |        |       |                |
| Single                             | 1              | 1     | 1                           | 1      | 1     | 1              |
| Married                            | 5.30           | 2.69  | 0.11                        | 1.88   | 10.52 | <b>0.04*</b>   |
| Divorced                           | -4.60          | 5.26  | -0.04                       | -14.98 | 5.78  | 0.38           |
| Widowed                            | -4.07          | 3.42  | -0.07                       | -10.81 | 2.67  | 0.24           |
| <b>Educational status</b>          |                |       |                             |        |       |                |
| Cannot read and write              | -8.81          | 3.06  | -0.19                       | -14.88 | -2.82 | <b>0.004*</b>  |
| Grade 1-8                          | -2.94          | 2.49  | -0.07                       | -7.84  | 1.97  | 0.24           |
| Grade 9-12                         | 0.04           | 2.62  | 0.001                       | -5.13  | 5.22  | 0.98           |
| College and above                  | 1              | 1     | 1                           | 1      | 1     | 1              |
| <b>Smoking history</b>             |                |       |                             |        |       |                |
| Yes                                | -9.03          | 2.66  | -0.21                       | -15.23 | -4.69 | <b>0.001**</b> |
| No                                 | 1              | 1     | 1                           | 1      | 1     | 1              |
| <b>Feeling of stigmatized</b>      |                |       |                             |        |       |                |
| Yes                                | -5.25          | 1.89  | -0.15                       | -8.94  | -1.56 | <b>0.005*</b>  |
| No                                 | 1              | 1     | 1                           | 1      | 1     | 1              |
| <b>Co morbidity status</b>         |                |       |                             |        |       |                |
| Yes                                | 1              | 1     | 1                           | 1      | 1     | 1              |
| No                                 | 6.05           | 2.18  | 0.16                        | 1.78   | 10.33 | <b>0.006*</b>  |
| <b>Chronic complication status</b> |                |       |                             |        |       |                |
| Yes                                | 1              | 1     | 1                           | 1      | 1     | 1              |
| No                                 | 6.04           | 2.28  | 0.11                        | 1.54   | 10.53 | <b>0.009*</b>  |
| <b>BMI</b>                         | -3.56          | 1.71  | -0.12                       | -6.94  | -0.18 | <b>0.040*</b>  |
| <b>DM Duration</b>                 | 0.15           | 1.10  | 0.01                        | -2.02  | 2.33  | 0.89           |
| <b>Types of DM</b>                 |                |       |                             |        |       |                |
| Type 1                             | 1              | 1     | 1                           | 1      | 1     | 1              |
| Type 2                             | 4.45           | 2.39  | 0.12                        | -0.24  | 9.17  | 0.064          |
| <b>Drug regimen</b>                |                |       |                             |        |       |                |
| Insulin only                       | 1              | 1     | 1                           | 1      | 1     | 1              |
| OHA                                | -5.66          | 3.46  | -0.16                       | -12.48 | 1.15  | 0.103          |
| Both                               | -1.42          | 4.02  | -0.02                       | -9.35  | 6.51  | 0.72           |

Dependent Variable: Overall health related quality of life.

## Discussion

The current study assessed the overall health-related quality of life among patients with type I and type II diabetes mellitus and its predictors in NSH.

According to this finding, the transformed overall mean score of the HRQoL was found to be moderate. The highest domain mean score was physical functioning. Domains of general health, mental health, bodily pain and vitality had mean score below the average. This result was lower when compared to the study result conducted in other places [12, 14, 23]. This discrepancy might be due to the difference in the socioeconomic status of the patients and the cultural difference across different regions. But it was congruent with the study result from Felege Hiwot Referral Hospital; Ethiopia [21]. This might be because of the possible similarity of the socioeconomic status of the study areas where the study participants shared almost the same life style and cultural perspectives.

The physical and mental components mean score from the current study was comparable with other studies [13, 24]. However, another study from Tehran hospital indicated that the physical and mental component mean score was relatively higher than that of the present study. The possible explanation for this difference could be the cultural and socio demographic difference of the patients across different study areas. The subjective nature of the HRQoL and the component measurement across different patients might also indicate the differences as HRQoL concerns subjective evaluations and also objective descriptors [10, 11].

In this study sex, age, marital status, educational level were among the socio demographic factors that had significant association with the health related quality of life of patients with diabetes mellitus. For instance, unable to read and write was inversely associated with the HRQoL indicating that diabetic patients who cannot read and write have lower understanding about the disease, the complication and the treatment as well as unable to make decision on better self care. The study disagreed with the study result from Greece where sex and educational level had not significant association with health related quality of life [10]. This difference could be because of the difference in socio demographic status of the patients.

As age increases the HRQoL of the diabetic patients would be decreased. This report was also noted in similar studies [11, 13, 25]. This might be because of the physiological alteration of the patients as they got older. Older individuals are mostly limited in physical activities, coping up the pain intensity and relief from pain [26]. However, findings from other parts of Ethiopia, South Africa and the Nordic countries were inconsistency with the current study result where age has no association with HRQoL [21, 27, 28].

Married diabetic patients had higher HRQoL when compared to the single patients. The finding from the other part of Ethiopia also agreed with the current study result [21, 29]. The possible explanation for this could be because of the married patients might be psychologically stable and have better social interaction in relation to those who are single.

Male diabetic patients had higher HRQoL mean score when compared to the female patients with the highest domain score of physical functioning and lower in general health in both sexes. This goes in line with other literatures indicated that women got worse HRQoL than males [11, 28]. But it contradicted with other studies [12, 26, 28]. This discrepancy could be due to the gender impact as most of the time women are treated inferiorly. They

1  
2 are less autonomous in giving decision on behalf of their rights. Moreover, evidences showed that women were  
3 more likely affected by DM than males. The risk of central obesity is higher among women which in turn lead to the  
4 enhancement of the risk of complication of diabetes mellitus. This greatly reduces HRQoL of the clients [1].  
5

6  
7 Even though, occupation and economic status of patients with diabetes mellitus seems to affect HRQoL. But, the  
8 current study did not show significant association with HRQoL of diabetic patients. However, there were other  
9 studies showing significance association between HRQoL and the patients' occupational and economic status [12,  
10 21]. The discrepancy could be due to the methodological difference. In the studies, economic status was reported  
11 just from the mean annual income of the patients. However, since the patients' way of disclosing their income level  
12 might not be accurate especially for unsalaried patients. This might overestimate the association.  
13  
14

15  
16 In this study, patients who had history of smoking had decreased HRQoL when compared to their counter parts.  
17 This result was supported by the report from CDC and study from United States that indicated the direct impact of  
18 smoking altering the health condition of the diabetic patients and reduced their HRQoL [5, 30]. Smokers have more  
19 likely to have central fat accumulation than non-smokers, and smoking is known to induce insulin resistance and  
20 compensatory insulin secretion responses, which could explain the increased risk of diabetes in those who smoke  
21 [22]. But, it was not associated factor in other studies [27, 31]. This could likely be because of difference in  
22 methodology.  
23  
24

25  
26 Both co morbidity condition and chronic complication related to diabetic was found to affect the HRQoL status  
27 which was similar with other studies [14, 15, 23, 21, 32]. This could be due to the fact that co morbid conditions are  
28 another challenging that could put the patients in worrying conditions. Patients might seek health care for both or  
29 above diseases in which case they were emotionally diseased, the role due to emotional problem might be under  
30 question. All the domains of HRQoL directly or indirectly would be affected. In another way, those who developed  
31 chronic complications were also live under the double crisis. In one way, they felt unhappy of being diabetic patient  
32 and in other way they would be under the psychological, physical, emotional, social and spiritual agony.  
33  
34

35  
36 In this study, the increase in BMI affected HRQoL negatively. But studies from South Africa and indicated that  
37 there was no significant association between BMI and HRQoL [13, 27]. This discrepancy could be due to the  
38 difference in the diabetic patients' knowledge gap and practice regarding their life style modification.  
39  
40

41  
42 Feeling of stigmatized of being diabetic patient inversely associated with HRQoL. This result goes in line with other  
43 literatures [17]. Because the diabetic patients are living under multiple restrictions, they would likely feel  
44 stigmatized in all aspects of their life. They are often restricted with regard to the amount, type and timing of food  
45 consumed. For example, eating mandatory foods at certain times, waiting for insulin to take effect before eating,  
46 etc. These restrictions may negatively affect an individual's HRQoL and their interaction with people around them,  
47 in their social lives and in the work place.  
48  
49

50  
51 The study had several limitations that have to be put in to consideration when used by other researchers. Since the  
52 study was a cross sectional study design, it is difficult to infer the cause-effect relationship (temporal relation). The  
53 study was facility based which could not be generalized to all diabetic patients remained in the community. Face-to-  
54  
55

1  
2 face interview was conducted by considering the different level of education of the participants, which might lead to  
3 the social desirability bias and could overestimate the result. The effect of recall bias also cannot be ruled out.  
4

5  
6 In conclusion, the present study identified that the HRQoL of diabetic patients on follow up at NSH was moderate.  
7 Domains of general health, mental health, bodily pain and vitality were the most affected domains among the  
8 diabetic patients. Sex, age, education status, marital status, history of smoking status, BMI, feeling of stigma status,  
9 co morbidity status and diabetic related chronic complication status were predictors of health related quality of life  
10 identified in this study.  
11  
12

13 There are several avenues for further researches based on the current finding. Longitudinal studies with larger  
14 sample size needs to be conducted in order to generalize the overall health related quality of life of diabetic patients  
15 at national level. Moreover, experimental and qualitative study design needs to be considered focusing the life style  
16 modification of the diabetic patients.  
17  
18

### 19 20 **Acknowledgements**

21 We are grateful to Wollega University, the study participants, data collectors and all other personnel who contribute  
22 their valuable input for the study to be accomplished.  
23  
24

### 25 **Compliance with ethical standards**

26 **Funding:** This work was financially supported by Wollega University with grant number WU/RD/256/2011.  
27

28 **Conflict of interest:** None declared.  
29

30 **Availability of data:** Data will be available on demand via the corresponding author's address  
31

32 **Ethical approval:** The study received letter of approval from Research Ethics Review Committee (RERC) of  
33 Wollega University, DPH/0081/2011.

34 **Informed consent:** Informed consent was obtained from all individual participants involved in the study.  
35

36 **Authors' contributions:** All authors were contributed from the conception of the study to the final draft of the  
37 manuscript. Material preparation, data collection, analysis and interpretation of the result were carried out by Bikila  
38 Regassa, Mekdes Tigistu and Belachew Etana. The first draft of the manuscript was written by BR and reviewed by  
39 MT and BE. All authors read and approved the final manuscript.  
40

41 **List of acronyms:** HRQoL: Health Related Quality of Life; PCA: Principal Component Analysis, MCS: Mental  
42 Component Score, PCS: Physical Component Score, NHS: Nekemte Specialized Hospital  
43  
44  
45  
46  
47  
48  
49  
50  
51  
52  
53  
54  
55  
56  
57  
58  
59  
60

## References

1. Kasper Braundwald Fauci, Hauser Longo Jameson (2005). *Harrisons's Principles of Internal medicine*, 17<sup>th</sup> edition, pg 2152-2180.
2. American Diabetes Association (2002). *Standards of Medical Care for Patients*. 25(1):s33–49.
3. Center for disease control and prevention. *National Diabetes Fact Sheet* , 2008.
4. James P. Boyle, Amanda A. Honeycutt, K.M Venkat Narayan, Thomas J. Hoerger, Linda S. Geiss, Homg Chen, et al. (2001). *Projection of Diabetes Burden Through 2050*. *Diabetes Care*, 24(11):1936–40.
5. Center for control and Prevention of diseases. *Smoking and diabetes*, (2014). Available from: [https://www.cdc.gov/tobacco/data\\_statistics/sgr/50th\\_anniversary/pdfs/fs\\_smoking\\_diabetes\\_508.pdf](https://www.cdc.gov/tobacco/data_statistics/sgr/50th_anniversary/pdfs/fs_smoking_diabetes_508.pdf). [cited 28Mar, 2019]
6. Bommer C, Sagalova V, Heeseemann E, Manne-goehler J, Atun R. (2015). *Global Economic Burden of Diabetes in Adults : Projections From 2015 to 2030*, 41:963–70.
7. International Diabetes Federation. *IDF Diabetes Atlas (2015): Global estimates of diabetes prevalence for 2017 and projections for 2045*. *Diabetology & Metabolic Syndrome. Elsevier B.V.* Available from: <https://doi.org/10.1016/j.diabres.2018.02.023>.
8. Al-shehri AH, Taha AZ, Bahnassy AA, Salah M. (2008). *Health-related quality of life in type 2 diabetic patients*. 25(5):352–60.
9. Kebede D, Alem A, Shibre T, Deyessa N. (2004). *Health related quality of life ( SF-36 ) survey in Butajira , rural Ethiopia : Normative data and evaluation of reliability and validity*. 289–97.
10. Dinesh Khanna JT. (2007). *Health-related Quality of Life- An Introduction*. *Am J Manag Care*, 13(9):218–23.
11. Goli M, Salarvand S, Dehvan F, Ghafouri H, Dalvand S. (2018). *Health-Related Quality of Life in Iranian Patients with Thalassemia Major : A Systematic Review and Meta-Analysis*, 6(59):8483–94.
12. Sreedevi A, Cherkil S, Kuttikattu DS, Kamalamma L, Oldenburg B. (2016). *Validation of WHOQOL-BREF in Malayalam and Determinants of Quality of Life Among People With Type 2 Diabetes in Kerala , India*, 28(1s):62S–69S.
13. Athanasia K. Papazafropoulou, Florentia Bakomitrou, Aikaterini Trikallinou et al. (2018). *Diabetes- dependent quality of life ( ADDQOL ) and affecting factors in patients with diabetes mellitus type 2 in Greece*. *BioMed Central*, 10(23):4–9.
14. Hayek AA Al, Robert AA, Saeed A Al, Alzaid AA, Sabaan FS Al. (2014). *Factors Associated with Health-Related Quality of Life among Saudi Patients with Type 2 Diabetes Mellitus : A Cross-Sectional Survey*, 38:220–9.
15. Anderson BJ, Laffel LM, Domenger C, Danne T, Phillip M, Mazza C, et al. (2017). *Factors Associated With Diabetes- Specific Health-Related Quality of Life in Youth With Type 1 Diabetes : The Global TEENS Study*, 40:1002–9.
16. Anne-Marie L Wegeberg, Theresa Meldgaard, Sofie Hyldahl et al. (2019). *Physical and psychological health domains of quality of life in type 2 diabetic patients in relation to clinical factors of diabetes mellitus in Egypt*, 10(2):87–95.
17. Gredig D, Bartelsen-raemy A. (2017). *Diabetes-related stigma affects the quality of life of people living with*



- 1 diabetes mellitus in Switzerland : implications for healthcare providers, 25(5):1620–33.
- 2
- 3
- 4 18. Chen HCLZX.(2017). Effect of exercise on the quality of life in type 2 diabetes mellitus: a systematic review.
- 5 *Diabetol Metab Syndr*,26(3):515–30.
- 6
- 7 19. Porojan M, Poantă L, Fodor D.(2009). Health-Related Quality of Life of Diabetic Patients, 47(4):409–13.
- 8
- 9 20. FMOH. Ethiopian National Guideline on Major NCDs (2016). Guidelines on Clinical and Programmatic
- 10 Management of Major Non Communicable Diseases. *Diabetology & Metabolic Syndrome*.
- 11 21. Reba K, Argaw Z, Bizuayehu Wale, Hordofa Gutema.(2018). Health related quality of life of patients with
- 12 diagnosed type 2 diabetes in Felege Hiwot Referral Hospital , North West Ethiopia : a cross sectional study.
- 13 *BioMed Central*,10(23):4–9.
- 14
- 15 22. John E. Ware, Cathy Donald Sherbourne (1992). The MOS 36-Item Short-Form Health Survey (SF-36).*Medical*
- 16 *care*, 30(6):473-483.
- 17
- 18 23. Zheng Y, Ley SH, Hu FB.(2017) Global aetiology and epidemiology of type 2 diabetes mellitus and its
- 19 complications. *Nature Publishing Group*,14(2):88–98.
- 20
- 21 24. Venkataraman K, Tai ES, Tock T, Hospital S, Teck K, Hospital P.(2013). Associations between complications
- 22 and health-related quality of life in individuals with diabetes, 78:865–73.
- 23
- 24 25. Kakhki AD, Abed Z.(2013). Health-Related Quality of Life of Diabetic Patients in Tehran, 11(4):1–6.
- 25
- 26 26. Wegeberg AL, Meldgaard T, Hyldahl S, Jakobsen PE, Drewes AM, Brock B, et al.(2019). Quantities of
- 27 comorbidities affects physical, but not mental health related quality of life in type 1 diabetes with confirmed
- 28 polyneuropathy, 10(2):87–95.
- 29
- 30 27. R Daya, Zbayat FJR.(2018). Effects of diabetes mellitus on health-related quality of life at a tertiary hospital in
- 31 South Africa : A cross-sectional study. *Diabetol Metab Syndr*,10(23):918–28.
- 32
- 33 28. Wändell PE.(2018). Quality of life of patients with diabetes mellitus An overview of research in primary health
- 34 care in the Nordic countries. *Diabetol Metab Syndr*,10(23).
- 35
- 36 29. Muze M, Hailu E, Woldemichael K, Fekecha B et al.(2018). Health Related Quality of Life And its Associated
- 37 Factors Among Diabetic Patients Attending Diabetes Clinic in Jimma University Teaching Hospital. *Diabetol*
- 38 *Metab Syndr*,10(23):7–11.
- 39
- 40 30. Qin W, Blanchette JE, Murrock C.(2019). Exploring the Relationship Between Lifestyle Behaviors and Health-
- 41 Related Quality of Life Among Older Adults With Diabetes, 45(1):96–104.
- 42
- 43 31. Tang TS, Funnell MM, Anderson RM.(2008). Social Support , Quality of Life , and Self-Care Behaviors
- 44 Among African Americans With Type 2 Diabetes, 34(2).
- 45
- 46 32. Core MA Del, Ahn J, Wukich DK, Liu GT, Lalli T, Vanpelt MD, et al. (2018). Gender Differences on SF-36
- 47 Patient-Reported Outcomes of Diabetic Foot Disease, 1–7.
- 48
- 49
- 50
- 51
- 52
- 53
- 54
- 55
- 56
- 57
- 58
- 59
- 60

## Annexes

### Annex I

Table showing correlation matrix of the eight domains among *diabetic patients on follow up at NSH, East Wollega , West Ethiopia, 2019,(n=215)*

| <b>Correlation Matrix</b> |       |       |       |       |       |       |       |       |               |
|---------------------------|-------|-------|-------|-------|-------|-------|-------|-------|---------------|
|                           | PF    | RP    | VT    | MH    | BP    | GH    | RE    | SF    | Overall HRQoL |
| PF                        | 1.000 |       |       |       |       |       |       |       |               |
| RP                        | .631  | 1.000 |       |       |       |       |       |       |               |
| VT                        | .089  | .127  | 1.000 |       |       |       |       |       |               |
| MH                        | .125  | .208  | .294  | 1.000 |       |       |       |       |               |
| BP                        | .043  | .092  | -.018 | -.002 | 1.000 |       |       |       |               |
| GH                        | .455  | .511  | .133  | .113  | -.030 | 1.000 |       |       |               |
| RE                        | .380  | .683  | .071  | .191  | .034  | .274  | 1.000 |       |               |
| SF                        | .590  | .640  | .166  | .276  | .042  | .549  | .327  | 1.000 |               |
| Overall HRQoL             | .763  | .916  | .207  | .301  | .128  | .637  | .747  | .765  | 1.000         |

### Annex II

Table showing the two component summary measures derived from principal component analysis for HRQoL among diabetic patients at NHS, western Ethiopia, 2019, (n=215).

| <b>Domains</b>       | <b>Component 1 (PCS)</b> | <b>Component 2 (MCS)</b> |
|----------------------|--------------------------|--------------------------|
| Physical functioning | 0.83                     |                          |
| Role physical        | 0.85                     |                          |
| Vitality             |                          | 0.81                     |
| Mental Health        |                          | 0.79                     |
| General health       | 0.75                     |                          |
| Bodily pain          | 0.93                     |                          |
| Social functioning   |                          | 0.83                     |
| Role emotional       |                          | 0.68                     |

# BMJ Open

## Predictors of health-related quality of life among diabetic patients on follow up at Nekemte Specialized Hospital, Western Ethiopia: A cross sectional study

|                                 |                                                                                                                                                                                                                                                                                                           |
|---------------------------------|-----------------------------------------------------------------------------------------------------------------------------------------------------------------------------------------------------------------------------------------------------------------------------------------------------------|
| Journal:                        | <i>BMJ Open</i>                                                                                                                                                                                                                                                                                           |
| Manuscript ID                   | bmjopen-2019-036106.R2                                                                                                                                                                                                                                                                                    |
| Article Type:                   | Original research                                                                                                                                                                                                                                                                                         |
| Date Submitted by the Author:   | 24-Apr-2020                                                                                                                                                                                                                                                                                               |
| Complete List of Authors:       | Feyisa, Bikila Regassa; Wollega University, Department of Public Health, Institute of Health Sciences<br>Yilma, Mekdes; Wollega University, Department of Public Health, Institute of Health Sciences<br>Tolessa, Belachew; Wollega University, Department of Public Health, Institute of Health Sciences |
| <b>Primary Subject Heading</b>: | Diabetes and endocrinology                                                                                                                                                                                                                                                                                |
| Secondary Subject Heading:      | Public health, Diabetes and endocrinology, Patient-centred medicine, Renal medicine                                                                                                                                                                                                                       |
| Keywords:                       | DIABETES & ENDOCRINOLOGY, Diabetic nephropathy & vascular disease < DIABETES & ENDOCRINOLOGY, Diabetic neuropathy < DIABETES & ENDOCRINOLOGY, Diabetic retinopathy < DIABETES & ENDOCRINOLOGY                                                                                                             |
|                                 |                                                                                                                                                                                                                                                                                                           |

SCHOLARONE™  
Manuscripts

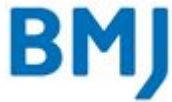

I, the Submitting Author has the right to grant and does grant on behalf of all authors of the Work (as defined in the below author licence), an exclusive licence and/or a non-exclusive licence for contributions from authors who are: i) UK Crown employees; ii) where BMJ has agreed a CC-BY licence shall apply, and/or iii) in accordance with the terms applicable for US Federal Government officers or employees acting as part of their official duties; on a worldwide, perpetual, irrevocable, royalty-free basis to BMJ Publishing Group Ltd ("BMJ") its licensees and where the relevant Journal is co-owned by BMJ to the co-owners of the Journal, to publish the Work in this journal and any other BMJ products and to exploit all rights, as set out in our [licence](#).

The Submitting Author accepts and understands that any supply made under these terms is made by BMJ to the Submitting Author unless you are acting as an employee on behalf of your employer or a postgraduate student of an affiliated institution which is paying any applicable article publishing charge ("APC") for Open Access articles. Where the Submitting Author wishes to make the Work available on an Open Access basis (and intends to pay the relevant APC), the terms of reuse of such Open Access shall be governed by a Creative Commons licence – details of these licences and which [Creative Commons](#) licence will apply to this Work are set out in our licence referred to above.

Other than as permitted in any relevant BMJ Author's Self Archiving Policies, I confirm this Work has not been accepted for publication elsewhere, is not being considered for publication elsewhere and does not duplicate material already published. I confirm all authors consent to publication of this Work and authorise the granting of this licence.

1  
2  
3  
4 1 **Predictors of health-related quality of life among diabetic patients on follow up at Nekemte**  
5  
6 2 **Specialized Hospital, Western Ethiopia: A cross sectional study**  
7  
8 3 **Bikila Regassa Feyisa\*<sup>1</sup>, Mekdes Tigistu Yilma<sup>1</sup>, Belachew Etana Tolessa<sup>1</sup>**  
9  
10 4

11  
12 5 **Corresponding author**  
13

14 6 **Bikila Regassa Feyisa**, Department of Public Health, Institute of Health Sciences, Wollega  
15  
16 7 University, Nekemte, Ethiopia, P.O. Box: 395

17  
18 8 Tell: (+251)927 48 82 35

19  
20  
21 9 Email: [bikregasa@gmail.com](mailto:bikregasa@gmail.com), ORCID ID: 0000-0002-7191-0218  
22

23  
24 10 **Affiliation:** <sup>1</sup> Department of Public health, Institute of Health Sciences, Wollega University,  
25  
26 11 Ethiopia, P.O. Box: 395

27  
28 12 MT:[mekdestigistu10@gmail.com](mailto:mekdestigistu10@gmail.com); ORCID ID: 00 00000216246529  
29

30  
31 13 BE:[ba.etana@gmail.com](mailto:ba.etana@gmail.com); ORCID ID: 0000-0001-9296-2095  
32  
33  
34  
35  
36  
37  
38  
39  
40  
41  
42  
43  
44  
45  
46  
47  
48  
49  
50  
51  
52  
53  
54  
55  
56  
57  
58  
59  
60

## 1 Abstract

2 **Objective:** To assess health-related quality of life (HRQoL) and its predictors among diabetic patients on follow up  
3 at Nekemte Specialized Hospital (NSH) in Western Ethiopia.

4 **Design, setting and participants:** This facility based cross sectional study was conducted among 224 patients with  
5 diabetes mellitus (types I and II) on follow up at one of the public hospitals in western Ethiopia. Respondents were  
6 selected by systematic random sampling and interviewed with the aid of a structured questionnaire.

7 **Main outcome measured:** HRQoL was measured by using the Medical outcomes study (MOS) 36-item Short Form  
8 (SF-36) Health Survey from 15<sup>th</sup> April to 5<sup>th</sup> June, 2019. A structured questionnaire was used for data collection  
9 from participants selected by systematic random sampling. Multiple linear regression was used for final model.

10 **Result:** A total of 215 diabetic patients consented and completed the study, giving a response rate of 96%. The mean  
11 score of the overall HRQoL of the study participants was  $50.3 \pm 18.1$ . The highest mean score was obtained in the  
12 physical functioning domain and the lowest mean score in the general health domain. Age, education status, history  
13 of smoking, feeling of stigmatization and body-mass index (BMI) were inversely associated with the overall  
14 HRQoL. Gender (male), marital status (currently married), absence of co morbidity and absence of chronic  
15 complications related to diabetes mellitus were positively associated with overall HRQoL.

16 **Conclusion:** The overall HRQoL of diabetic patients on follow up at the study area was found to be moderate.  
17 General health, mental health, bodily pain and vitality were the most affected domains. Both the mental and physical  
18 components need to be considered when caring for the diabetic patients on follow up beyond provision of treatment.

19 **Key words:** diabetic patients, health related quality of life, Nekemte

## 20 Strength and limitations of this study

- 21 • To the best of the authors' knowledge, the study was the first to explore the predictors of health-related  
22 quality of life (HRQoL) among patients with types I and II diabetes mellitus in Ethiopia.
- 23 • We used an established tool with good psychometric properties.
- 24 • No comparison was made between types I and II diabetes mellitus.
- 25 • The study had a cross sectional design that could make it difficult to identify whether cause or effect  
26 happened first.

## 27 Introduction

28 Diabetes Mellitus (DM) refers to a group of common metabolic disorders that share the phenotype of  
29 hyperglycemia. Several distinct types of DM exist and are caused by complex interactions of genetics and  
30 environmental factors. The two broad categories of DM are designated as type I and type II DM. It is characterized  
31 by chronic high blood glucose level ( $>126$  mg/dl for fasting blood sugar and/or a 2-hour postprandial glucose of  
32  $\geq 200$  mg/dl or if the individual had symptoms of diabetes and a random plasma glucose  $\geq 200$  mg/dl (confirmed by  
33 repeat testing) [1-3].

1  
2 1 Diabetes mellitus is becoming a growing problem that has significant impact on health status and quality of life. It is  
3 2 considered an urgent public health problem, which can influence the HRQoL negatively [2, 3].

4 3 Worldwide, 8.8 % of adults aged 20-79 years had diabetes in 2015 which was projected to reach 366 million in 2030  
5 4 and 642 million (one in ten adults) by 2040, among which about 75% lived in low- and middle-income countries.  
6 5 Globally about 5 million deaths among those aged 20-99 years were attributable to diabetes [4-7].

7 6 There is now a consensus that the health of the general population cannot be well characterized from the analyses of  
8 7 mortality and morbidity statistics alone and that there is also a need to consider health in terms of people's  
9 8 assessment of their sense of wellbeing and ability to perform social roles [7-9].

10 9 Health-related quality of life (HRQoL) is a multidimensional concept that focuses on the impact of illness and  
11 10 treatment on patients, and it can measure patients' perceptions of illness and treatment, their perceived needs for  
12 11 healthcare providers and their preferences for treatment and outcomes of the disease [10].

13 12 Health related quality of life concerns both subjective and objective measurements of individuals. It has been  
14 13 defined as "an overall general well-being that comprises objective descriptors and subjective evaluations of physical,  
15 14 material, social, and emotional well-being together with the extent of personal development and purposeful activity,  
16 15 all weighted by a personal set of values [11].

17 16 Diabetes Mellitus negatively influences HRQoL. This negative influence affects many aspects of a person's life,  
18 17 including the psychological impact of being chronically ill, dietary restrictions, changes in social life, symptoms of  
19 18 an inadequate metabolic system, chronic complications and in due course lifelong infirmities [12-15].

20 19 Studies have indicated that the HRQoL of patients with DM is decreased by different domains of HRQoL such as  
21 20 role limitation due to the disease, emotional disturbances, pain, and fatigability. Other factors related to HRQoL  
22 21 among diabetic patients also affect both quality and length of life of patients with DM. These are socio  
23 22 demographics and economic status, behavioral, clinical and social related factors [16, 17].

24 23 Diabetes mellitus permanently changes the patient's lifestyle. Daily self-care, consisting of daily insulin injections  
25 24 or oral anti diabetic agents, self-monitoring of blood glucose and diabetic recommended diet has an impact on  
26 25 HRQoL. Moreover, the acute and chronic complications which might develop in due course affect the patients  
27 26 HRQoL [18, 19].

28 27 In Ethiopia, even though programs have been launched regarding chronic disease management, prevention,  
29 28 screening, diagnosis, treatment and care, little is emphasized on factors that affect the HRQoL among patients. The  
30 29 Ethiopian National Guideline on Major NCDs lacks the specific areas of HRQoL dimension which is affected by the  
31 30 disease. The existing articles and reviews have tried to indicate the epidemiology, complications, therapies,  
32 31 comparisons of treatments and health strategies but the data regarding predictors of HRQoL and how much it is  
33 32 actually affected by the condition is scarce [20].

34 33 Therefore, the study was designed to predict the level of health related quality of life and factors associated with it  
35 34 among diabetic patients in Nekemte Specialized Hospital.

## 1 **Research Design and Method**

### 2 **Study Design and setting**

3 Facility based cross sectional study design was employed from 15<sup>th</sup> April to 5<sup>th</sup> June, 2019. The study was conducted  
4 among diabetic patients on follow up at Nekemte Specialized Hospital (NSH) which is found in Nekemte City  
5 located in Western Ethiopia and 331 km away from the capital city of Ethiopia, Addis Ababa.

6 Diabetic follow up and care services started separately as chronic diseases clinic at the Hospital in 2010 with 96  
7 cases. According to the unpublished report of NSH on the 1<sup>st</sup>February, 2019, 591 diabetic patients of both types I  
8 and II were on follow up at the chronic disease clinic.

### 9 **Eligibility criteria**

10 All known DM patients of type I and type II who have been on follow up for at least one year duration and age  
11 greater than 18 years at NSH were included while diabetic patients of both types who could not respond to the  
12 interview because of very serious illness were excluded from the study.

### 13 **Sample size and sampling procedure**

14 The sample size was determined assuming normally distributed independent means. The overall mean score of  
15  $52.6 \pm 12.1$  obtained from a study on HRQoL of patients with diagnosed type 2 diabetes in Ethiopia [21] was used to  
16 calculate the sample size for the first objective. Sample size for the second objective was calculated using the mean  
17 of the independent variables from different studies. The calculated sample sizes were compared for the maximum  
18 value with assumption of 95% CI  $Z_{\alpha/2} = 1.96$ ) and 5% marginal error. After using correction formula and adding 5%  
19 non response rate, the final sample size became 224.

20 Systematic random sampling was used to select the study participants. The sampling interval was calculated by  
21 dividing the total number of diabetic patients on follow up as counted from the registries by the calculated sample  
22 size.

### 23 **Data collection procedure**

24 Data was collected using an interviewer administered structured questionnaire which was adopted from the MOS  
25 36-item short form (SF-36) health survey. The English version of the questionnaire was translated to Afaan Oromoo  
26 (the local language) and translated back to English by other language experts to check its consistency. We recruited  
27 and trained four BSc nurse data collectors and one experienced MPH professional supervisor for the data collection  
28 process.

### 29 **Instruments**

30 The instrument consists of the WHO SF-36 item questionnaires adopted from MOS 36-SF instrument [22] and socio  
31 demographic and economic profiles. The SF-36 consists of 36 questions containing physical functioning (10 items),  
32 role limitation due to physical health (4 items), body pain (2 items), vitality (4 items), social functioning (2 items),  
33 role limitation due to emotional problem (3 items), mental health (5 items) and general health (6 items).



## 1 **Data processing analysis**

2 Each item of SF-36 was scored on a linear scale and the negatively worded questions were inversely coded before  
3 analysis. The score of each domain was obtained by summation of the corresponding items. The scores were then  
4 linearly transformed on a 0-100 scale. Mean scores were then adjusted to make the domain scores comparable with  
5 the scores used in the MOS (0-100) (lower scores denote lower quality of life).

6 Aggregate component scores were calculated by principal component analysis (PCA) after all eight domain scores  
7 were checked. All assumptions were checked prior to running PCA. Components with eigen-value greater than 1  
8 were retained for further analysis. The factor loadings above 0.4 were taken and included in the result. The retained  
9 factors were orthogonally rotated. Finally, two summary scores (subscales), physical component score (PCS) and  
10 mental component score (MCS), were derived from PCA.

11 Dummy variables were created for categorical variables that have more than two categories like marital status,  
12 educational status, age category and the drug regimen.

13 For the internal consistency reliability of the SF-36 items, Cronbach's alpha [22] was checked and found to be 0.876  
14 which was in the acceptable level.

15 Betas ( $\beta$ -Coefficients) were used to interpret the strength of predictors of HRQoL. The degree of association  
16 between pairs of variables was measured by Pearson's correlation coefficient ( $r$ ). The independent variables at  $P <$   
17 0.05 were considered as statistically significant. Multicollinearity was checked using variance inflation factors  
18 (VIFs). The maximum value for VIF was 2.3.

## 19 **Patient and Public involvement**

20 Patients were interviewed and this is a level of involvement.

## 21 **Results**

### 22 **Socio demographic characteristics**

23 A total of 215 diabetic patients on follow up at NSH were included in the analysis with response rate of 96%.  
24 Among the total respondents, 122 (56.7%) of them were males and the mean age of all the respondents was  $41.6 \pm$   
25 15.4 years, 141 (65.6%) of them were resident in the urban area. More than two-thirds, 146 (67.9%) of the total  
26 respondents were married and majority, 198 (92.1%) of them were Oromo. The mean family size of the respondents  
27 was  $4.8 \pm 1.5$ . Thirty eight (17.7%) of the study participants could not read and write and only 52 (24.2%) of them  
28 were employed either at government and/or nongovernmental organizations (**Table 1**).

1  
2 Table 1: Socio demographic and socio economic characteristics of diabetic patients on follow up at NSH,  
3 Nekemte, East Wollega, West Ethiopia, (n=215).  
4

| Variables                             | Frequency (n=215) | Percentage |
|---------------------------------------|-------------------|------------|
| <b>Sex</b>                            |                   |            |
| Male                                  | 122               | 56.7       |
| Female                                | 93                | 43.3       |
| <b>Mean age in year</b>               | 41.6 (± SD 15.4)  |            |
| <b>Residence</b>                      |                   |            |
| Urban                                 | 141               | 65.6       |
| Rural                                 | 74                | 34.4       |
| <b>Marital status</b>                 |                   |            |
| Married                               | 146               | 67.9       |
| Single                                | 42                | 19.5       |
| Divorced                              | 6                 | 2.8        |
| Widowed                               | 21                | 9.8        |
| <b>Ethnicity</b>                      |                   |            |
| Oromo                                 | 198               | 92.1       |
| Amhara                                | 9                 | 4.2        |
| Guraghe                               | 5                 | 2.3        |
| Other <sup>a</sup>                    | 3                 | 1.4        |
| <b>Educational status</b>             |                   |            |
| Cannot read and write                 | 38                | 17.7       |
| Grade 1-8                             | 63                | 29.3       |
| Grade 9-12                            | 50                | 23.3       |
| College/University                    | 64                | 29.8       |
| <b>Occupation</b>                     |                   |            |
| Government/NGO employee               | 52                | 24.2       |
| Merchant                              | 23                | 10.7       |
| Farmer                                | 41                | 19.1       |
| Housewife                             | 46                | 21.4       |
| Retired                               | 23                | 10.7       |
| Other <sup>b</sup>                    | 30                | 14.0       |
| <b>Economic status (Wealth index)</b> |                   |            |
| Poorest                               | 43                | 20.0       |
| Poor                                  | 38                | 17.7       |
| Medium                                | 46                | 21.4       |
| Wealthy                               | 45                | 20.9       |
| Wealthiest                            | 43                | 20.0       |

3 <sup>a</sup>Other (Tigre, Silte)    <sup>b</sup>Other (Student, carpenter)  
4

#### 4 **Medical history and health condition**

5 More than half, 125 (58.1%) of the study participants had type 2 diabetes mellitus. Almost half, 108 (50.2%) of  
6 them had been diagnosed within the last five years. Regarding treatment, 99 (46%) of the patients were using only  
7 insulin while 93 (43.3%) and 23 (10.7%) were using oral hypoglycemic agents and both insulin and oral  
8 hypoglycemic agents respectively.

9 Nearly half, 103 (47.9%) of the study participants were co morbid and hypertension accounted for 85 (82.5%) of co-  
10 morbid conditions. Sixty three (29.3%) of the study participants had diabetes-related acute complications which

1 included diabetes keto acidosis (DKA), 40 (63.5%), Hypoglycemia 20 (31.7%) and non ketotic hyperosmolar state  
 2 3(4.8%) respectively. Sixty-nine of the study subjects had diabetes related chronic complications which accounted  
 3 for around 32.1% where diabetic neuropathy (including foot ulcer, peripheral pain, and gangrene) covered almost  
 4 half, 49.3% as illustrated in **table 2**.

5 Table 2: Medical history and health condition of diabetic patients on follow up at NSH, Nekemte, East Wollega,  
 6 West Ethiopia, (n=215).

| Variable                                                 | Frequency (n) | Percent (%) |
|----------------------------------------------------------|---------------|-------------|
| <b>Duration of DM (years)</b>                            |               |             |
| <5                                                       | 108           | 50.2        |
| 6-10                                                     | 59            | 27.4        |
| 11-15                                                    | 32            | 14.9        |
| >15                                                      | 16            | 7.4         |
| <b>Drug regimen</b>                                      |               |             |
| Insulin only                                             | 99            | 46.0        |
| Oral hypoglycemic agents                                 | 93            | 43.3        |
| Insulin and oral hypoglycemic agents                     | 23            | 10.7        |
| <b>Presence of co morbidity</b>                          |               |             |
| Yes                                                      | 103           | 47.9        |
| No                                                       | 112           | 52.1        |
| <b>Presence of diabetic related chronic complication</b> |               |             |
| Yes                                                      | 69            | 32.1        |
| No                                                       | 146           | 67.9        |
| <b>Types of acute complications</b>                      |               |             |
| DKA                                                      | 40            | 63.5        |
| Hypoglycemia                                             | 20            | 31.7        |
| Non ketotic hyperosmolar state                           | 3             | 4.8         |
| <b>Type of chronic complication</b>                      |               |             |
| Diabetic neuropathy                                      | 34            | 49.3        |
| Diabetic Retinopathy                                     | 19            | 27.5        |
| Diabetic nephropathy                                     | 14            | 20.3        |
| Other                                                    | 2             | 2.9         |
| <b>Body mass index (BMI) (kg/m<sup>2</sup>)</b>          |               |             |
| <18.5                                                    | 5             | 2.3         |
| 18.5-25                                                  | 122           | 56.7        |
| 25-30                                                    | 80            | 37.2        |
| >30                                                      | 8             | 3.7         |

## 7 **Health related quality of life of the study participants**

9 The transformed mean score of the overall HRQoL of the study participants was found to be  $50.3 \pm 18.1$  with  
 10 minimum and maximum scores of 16.4 and 79.1 respectively. Among the eight domains of HRQoL, the study  
 11 participants scored highest ( $63.2 \pm 34.4$ ) mean score in physical functioning and lowest ( $30.2 \pm 22.9$ ) mean score in  
 12 general health domain. When analyzing the HRQoL by domains general health, mental health, bodily pain and  
 13 vitality had mean score below 50 indicating that they were the most affected domains among the diabetic patients  
 14 (**Table 3**).

Two component scores of the HRQoL were generated by PCA with the total variance explained 66.8%. Physical functioning, physical role limitation, general health and bodily pain dimension scales correlate most highly with the physical component of HRQoL. Moreover, the mental health component of HRQoL correlates most highly with mental health, social functioning, emotional role limitation and vitality (**Annex I and II**). The higher mean score was found for the mental component score ( $51.8 \pm 16.7$ ) with the maximum score of 80.8.

Table 3: HRQoL of diabetic patients at NSH, East Wollega, West Ethiopia, (n=215).

| Domains of HRQoL, Overall HRQoL, PCS and MCS  | Mean  | SD   | Minimum score (%) | Maximum score (%) |
|-----------------------------------------------|-------|------|-------------------|-------------------|
| Physical Functioning (PF)                     | 63.2  | 34.4 | 14.4              | 97.6              |
| Role limitation due to physical health (RP)   | 53.4  | 44.8 | 8.6               | 98.2              |
| Role limitation due to emotional problem (RE) | 52.77 | 45.8 | 6.97              | 98.6              |
| Energy/Fatigue (Vitality, VT)                 | 48.5  | 7.8  | 20                | 75                |
| Emotional wellbeing (Mental Health, MH)       | 49.8  | 8.0  | 20                | 72                |
| Social Functioning (SF)                       | 56.0  | 30.1 | 12.9              | 86                |
| Bodily Pain (BP)                              | 48.6  | 11   | 12.5              | 80                |
| General Health (GH)                           | 30.2  | 22.9 | 7.3               | 95                |
| Overall HRQoL                                 | 50.3  | 18.1 | 16.4              | 79.1              |
| Physical Component Score (PCS)                | 48.8  | 21.9 | 10                | 87.5              |
| Mental Component Score (MCS)                  | 51.8  | 16.7 | 19.8              | 80.8              |

7

### 8 Predictors of health related quality of life of diabetic patients

9 The multiple linear regression model indicated that a unit increase in age would likely decrease health related quality of life of diabetic patients by 0.25 ( $\beta=-0.25$ , 95% CI, -0.43 to -0.07,  $p=0.007$ ) controlling all other independent variables.

12 Males had about five times better HRQoL when compared to females ( $\beta=5.23$ , 95% CI, 1.10-9.36,  $p=0.013$ ). Respondents who were married had about five times better HRQoL compared to those who were single controlling for all other independent variables ( $\beta=5.30$ , 95% CI, 1.88-10.52,  $P=0.04$ ).

15 Respondents who were unable to read and write had about nine times lower HRQoL ( $\beta=-8.81$ , 95% CI, -14.88 to -2.82,  $P=0.004$ ) when compared to those who achieved college and above after controlling all other predictors.

17 History of smoking was found to affect the HRQoL status of the diabetic patients. Diabetic patients who had history of smoking had nine units times lower HRQoL ( $\beta=-9.03$ , 95% CI, -15.23- -4.69,  $P<0.001$ ) when compared to their counterparts. Similarly, feelings of stigmatization because of being a diabetic patient would likely decrease HRQoL by 5.25 units ( $\beta=-5.25$ , 95% CI, -8.94 to -1.56,  $P=0.005$ ) compared to their counterparts.

1  
2  
3  
4  
5  
6  
7  
8  
9  
10  
11  
12  
13  
14  
15  
16  
17  
18  
19  
20  
21  
22  
23  
24  
25  
26  
27  
28  
29  
30  
31  
32  
33  
34  
35  
36  
37  
38  
39  
40  
41  
42  
43  
44  
45  
46  
47  
48  
49  
50  
51  
52  
53  
54  
55  
56  
57  
58  
59  
60

1 Absence of co-morbid conditions and chronic complications related to diabetes mellitus was found to increase  
2 HRQoL. In both cases, those who had not had the condition had about six units better HRQoL than their  
3 counterparts. A one unit increase in the BMI would likely decrease the HRQoL by 3.56 units ( $\beta=-3.56$ , 95% CI,-  
4 6.94 to -0.18, P=0.040) **Table 4**

5 Table 4: Multiple linear regression analysis of diabetic patients on follow up at NSH, East Wollega , West  
6 Ethiopia, (n=215)

| Variables                          | Unstandardized Coefficient |       | Standardized Coefficient | 95% CI |       | P-value        |
|------------------------------------|----------------------------|-------|--------------------------|--------|-------|----------------|
|                                    | B                          | SE    |                          | Lower  | Upper |                |
| <b>(Constant)</b>                  | 69.41                      | 10.31 |                          | 49.16  | 89.74 | 0.000          |
| <b>Sex</b>                         |                            |       |                          |        |       |                |
| Female                             | 1                          | 1     | 1                        | 1      | 1     | 1              |
| Male                               | 5.23                       | 2.11  | 0.14                     | 1.10   | 9.36  | <b>0.013*</b>  |
| <b>Age</b>                         | -0.25                      | 0.08  | -0.20                    | -0.43  | -0.07 | <b>0.007*</b>  |
| <b>Marital status</b>              |                            |       |                          |        |       |                |
| Single                             | 1                          | 1     | 1                        | 1      | 1     | 1              |
| Married                            | 5.30                       | 2.69  | 0.11                     | 1.88   | 10.52 | <b>0.04*</b>   |
| Divorced                           | -4.60                      | 5.26  | -0.04                    | -14.98 | 5.78  | 0.38           |
| Widowed                            | -4.07                      | 3.42  | -0.07                    | -10.81 | 2.67  | 0.24           |
| <b>Educational status</b>          |                            |       |                          |        |       |                |
| Cannot read and write              | -8.81                      | 3.06  | -0.19                    | -14.88 | -2.82 | <b>0.004*</b>  |
| Grade 1-8                          | -2.94                      | 2.49  | -0.07                    | -7.84  | 1.97  | 0.24           |
| Grade 9-12                         | 0.04                       | 2.62  | 0.001                    | -5.13  | 5.22  | 0.98           |
| College and above                  | 1                          | 1     | 1                        | 1      | 1     | 1              |
| <b>Smoking history</b>             |                            |       |                          |        |       |                |
| Yes                                | -9.03                      | 2.66  | -0.21                    | -15.23 | -4.69 | <b>0.001**</b> |
| No                                 | 1                          | 1     | 1                        | 1      | 1     | 1              |
| <b>Feeling of stigmatized</b>      |                            |       |                          |        |       |                |
| Yes                                | -5.25                      | 1.89  | -0.15                    | -8.94  | -1.56 | <b>0.005*</b>  |
| No                                 | 1                          | 1     | 1                        | 1      | 1     | 1              |
| <b>Co morbidity status</b>         |                            |       |                          |        |       |                |
| Yes                                | 1                          | 1     | 1                        | 1      | 1     | 1              |
| No                                 | 6.05                       | 2.18  | 0.16                     | 1.78   | 10.33 | <b>0.006*</b>  |
| <b>Chronic complication status</b> |                            |       |                          |        |       |                |
| Yes                                | 1                          | 1     | 1                        | 1      | 1     | 1              |
| No                                 | 6.04                       | 2.28  | 0.11                     | 1.54   | 10.53 | <b>0.009*</b>  |
| <b>BMI</b>                         | -3.56                      | 1.71  | -0.12                    | -6.94  | -0.18 | <b>0.040*</b>  |
| <b>DM Duration</b>                 | 0.15                       | 1.10  | 0.01                     | -2.02  | 2.33  | 0.89           |
| <b>Types of DM</b>                 |                            |       |                          |        |       |                |
| Type 1                             | 1                          | 1     | 1                        | 1      | 1     | 1              |
| Type 2                             | 4.45                       | 2.39  | 0.12                     | -0.24  | 9.17  | 0.064          |
| <b>Drug regimen</b>                |                            |       |                          |        |       |                |
| Insulin only                       | 1                          | 1     | 1                        | 1      | 1     | 1              |
| OHA                                | -5.66                      | 3.46  | -0.16                    | -12.48 | 1.15  | 0.103          |
| Both                               | -1.42                      | 4.02  | -0.02                    | -9.35  | 6.51  | 0.72           |

7 Dependent Variable: Overall health related quality of life.

## Discussion

The current study assessed the overall health-related quality of life among patients with type I and type II diabetes mellitus and its predictors in Nekemte specialized hospital.

According to this finding, the transformed overall mean score of the HRQoL was found to be moderate. The highest mean score was recorded in the physical functioning domain. Domains of general health, mental health, bodily pain and vitality had mean score below the average. This was lower when compared to the result obtained in other places [14, 12, 35]. This discrepancy might be due to the differences in the socioeconomic status of the patients and cultural differences across different regions. But it was congruent with the study result from Felege Hiwot Referral Hospital; Ethiopia [21]. This might be because of the possible similarity of the socioeconomic status of the study areas where the study participants shared almost the same lifestyle and cultural perspectives.

The physical and mental components mean score from the current study was comparable with other studies [13, 25]. However, another study from Tehran hospital [27] indicated that the physical and mental component mean score was relatively higher than that of the present study. The possible explanation for this difference could be the cultural and socio demographic difference of the patients across different study areas. The subjective nature of the HRQoL and the component measurement across different patients might also explain the differences as HRQoL concerns subjective evaluations and also objective descriptors [10, 11].

In this study sex, age, marital status, educational level were among the socio demographic factors that had significant association with the health related quality of life of patients with diabetes mellitus. For instance, inability to read and write was inversely associated with the HRQoL indicating that diabetic patients who cannot read and write have lower understanding about the disease, complications and treatment as well as being unable to make decisions on better self care. The study disagreed with the study result from Greece where sex and educational level had not significant association with health related quality of life [10]. This difference could be because of the difference in socio demographic status of the patients.

As age increases the HRQoL of the diabetic patients decreased. This result was also noted in similar studies [11, 13, 27]. This might be because of the physiological alteration of the patients as they got older. Older individuals are mostly limited in physical activities, coping with pain intensity and relief from pain [26]. However, findings from other parts of Ethiopia, South Africa and the Nordic countries were inconsistent with the current study result where age has no association with HRQoL [21, 28, 30].

Married diabetic patients had higher HRQoL when compared to the single patients. The finding from the other part of Ethiopia also agreed with the current study result [21, 33]. The possible explanation for this could be that the married patients might be psychologically stable and have better social interaction in relation to those who are single.

Male diabetic patients had higher HRQoL mean score when compared to the female patients with the highest domain score of physical functioning and lower in general health in both sexes. This goes in line with other literature which indicated that women had worse HRQoL than males [11, 29]. But it contradicted with other studies [12, 27, 30]. This discrepancy could be due to the gender impact as most of the time women are treated inferiorly.

1  
2 They are less autonomous in giving decision on behalf of their rights. Moreover, evidences showed that women  
3 were more likely affected by DM than males. The risk of central obesity is higher among women which in turn lead  
4 to the enhancement of the risk of complication of diabetes mellitus. This greatly reduces HRQoL of the clients [1].  
5

6 Although occupation and economic status of patients with diabetes mellitus seems to affect HRQoL, the current  
7 study did not show significant association with HRQoL of diabetic patients. However, there were other studies  
8 showing significant associations between HRQoL and the patients' occupational and economic status [12, 21]. The  
9 discrepancy could be due to the methodological differences. In the studies, economic status was reported just from  
10 the mean annual income of the patients. However, since the patients' way of disclosing their income level might not  
11 be accurate especially for unsalaried patients. This might overestimate the association.  
12  
13  
14  
15

16 In this study, patients who had history of smoking had decreased HRQoL when compared to their counterparts. This  
17 result was supported by the report from CDC and a study from the United States that indicated the direct impact of  
18 smoking altering the health condition of the diabetic patients and reduced their HRQoL [5, 32]. Smokers have more  
19 likely to have central fat accumulation than non-smokers, and smoking is known to induce insulin resistance and  
20 compensatory insulin secretion responses, which could explain the increased risk of diabetes in those who smoke  
21 [22]. But, it was not associated factor in other studies [26, 34]. This could likely be because of difference in  
22 methodology.  
23  
24  
25

26 Both co morbidity condition and chronic complication related to diabetic status was found to affect the HRQoL  
27 status which was similar with other studies [14, 15, 24, 21, 33]. This could be due to the fact that co morbid  
28 conditions are another challenge that could put the patients in worrying conditions. Patients might seek health care  
29 for both or above diseases in which case they were emotionally diseased, the role due to emotional problem might  
30 be under question. All the domains of HRQoL directly or indirectly would be affected. In another way, those who  
31 developed chronic complications would also live under the double crisis. In one way, they felt unhappy of being  
32 diabetic patient and in other way they would be under the psychological, physical, emotional, social and spiritual  
33 agony.  
34  
35  
36  
37

38 In this study, the increase in BMI affected HRQoL negatively. But studies from South Africa indicated that there  
39 was no significant association between BMI and HRQoL [13, 28]. This discrepancy could be due to the difference in  
40 the diabetic patients' knowledge gap and practice regarding their lifestyle modification.  
41  
42

43 Feeling of stigmatization of being a diabetic patient was inversely associated with HRQoL. This result goes in line  
44 with other literatures [17]. Because the diabetic patients are living under multiple restrictions, they would likely feel  
45 stigmatized in all aspects of their life. They are often restricted with regard to the amount, type and timing of food  
46 consumed. For example, eating mandatory foods at certain times, waiting for insulin to take effect before eating,  
47 etc. These restrictions may negatively affect an individual's HRQoL and their interaction with people around them,  
48 in their social lives and in the work place.  
49  
50  
51

52 The study had several limitations that have to be put in to consideration when used by other researchers. Since the  
53 study was a cross sectional study design, it is difficult to infer the cause-effect relationship (temporal relation). The  
54 study was facility based which could not be generalized to all diabetic patients in the community. Face-to- face  
55  
56  
57

1  
2 interviews were conducted by considering the different level of education of the participants, which might lead to  
3 the social desirability bias and could overestimate the result. The effect of recall bias also cannot be ruled out.  
4

5  
6 In conclusion, the present study identified that the HRQoL of diabetic patients on follow up at NSH was moderate.  
7 Domains of general health, mental health, bodily pain and vitality were the most affected domains among the  
8 diabetic patients. Sex, age, education status, marital status, history of smoking status, BMI, feeling of stigma status,  
9 co morbidity status and diabetic related chronic complication status were predictors of health related quality of life  
10 identified in this study.  
11  
12

13 There are several avenues for further research based on the current finding. Longitudinal studies with larger sample  
14 size needs to be conducted in order to generalize the overall health related quality of life of diabetic patients at  
15 national level. Moreover, experimental and qualitative study design needs to be considered focusing on lifestyle  
16 modification of diabetic patients.  
17  
18

### 19 **Acknowledgements**

20  
21 We are grateful to Wollega University, the study participants, data collectors and all other personnel who contribute  
22 their valuable input for the study to be accomplished.  
23  
24

### 25 **Compliance with ethical standards**

26 **Funding:** This work was financially supported by Wollega University with grant number WU/RD/256/2011.

27 **Conflict of interest:** None declared.

28 **Availability of data:** Data will be available on demand via the corresponding author's address

29 **Ethical approval:** The study received letter of approval from Research Ethics Review Committee (RERC) of  
30 Wollega University, DPH/0081/2011.  
31

32 **Informed consent:** Informed consent was obtained from all individual participants involved in the study.

33  
34 **Authors' contributions:** All authors were contributed from the conception of the study to the final draft of the  
35 manuscript. Material preparation, data collection, analysis and interpretation of the result were carried out by Bikila  
36 Regassa, Mekdes Tigistu and Belachew Etana. The first draft of the manuscript was written by BR and reviewed by  
37 MT and BE. All authors read and approved the final manuscript.  
38  
39

40 **List of acronyms:** HRQoL: Health Related Quality of Life; PCA: Principal Component Analysis, MCS: Mental  
41 Component Score, PCS: Physical Component Score, NHS: Nekemte Specialized Hospital  
42  
43  
44  
45  
46  
47  
48  
49  
50  
51  
52  
53  
54  
55  
56  
57



## References

1. Kasper B, Fauci, Hauser L, Jameson (2005). *Harrisons's Principles of Internal medicine*, 17<sup>th</sup> eddition, *McGraw-Hill's Access medicine*, pg 2152-2180.
2. American Diabetes Association (2002). Standards of Medical Care for Patients. 25(1):s33–49.
3. Center for disease control and prevention. National Diabetes Fact Sheet , 2008.
4. James P. Boyle, Amanda A. Honeycutt, K.M Venkat Narayan,Thomas J.Hoerger,Linda S.Geiss, Homg Chen, et al. (2001). Projection of Diabetes Burden Through 2050. *Diabetes Care*, 24(11):1936–40.
5. Center for Control and Prevention of diseases. Smoking and diabetes, (2014). Available from:[https://www.cdc.gov/tobacco/data\\_statistics/sgr/50<sup>th</sup> anniversary/pdfs/fs\\_smoking\\_diabetes\\_508.pdf](https://www.cdc.gov/tobacco/data_statistics/sgr/50th_anniversary/pdfs/fs_smoking_diabetes_508.pdf). [cited 28 Mar, 2019]
6. Bommer C, Sagalova V, Heeseemann E, Manne-goehler J, Atun R.(2015). Global Economic Burden of Diabetes in Adults : Projections From 2015 to 2030,*Diabetes Care*, 41:963–70.
7. International Diabetes Federation. IDF Diabetes Atlas (2015): Global estimates of diabetes prevalence for 2017 and projections for 2045. *Diabetology & Metabolic Syndrome. Elsevier B.V.* Available from: <https://doi.org/10.1016/j.diabres.2018.02.023>.
8. Al-shehri AH, Taha AZ, Bahnassy AA, Salah M. (2008). Health-related quality of life in type 2 diabetic patients. *Ann Saudi Med*, 25(5):352–60.
9. Kebede D, Alem A, Shibre T, Deyessa N.(2004). Health related quality of life ( SF-36 ) survey in Butajira , rural Ethiopia : Normative data and evaluation of reliability and validity.*Ethiopian medical journal*, 289–97.
10. Dinesh Khanna JT. (2007). Health-related Quality of Life- An Introduction. *Am J Manag Care*, 13(9):218–23.
11. Goli M, Salarvand S, Dehvan F, Ghafouri H, Dalvand S. (2018). Health-Related Quality of Life in Iranian Patients with Thalassemia Major : A Systematic Review and Meta-Analysis, *Int J Pediatr*, 6(59):8483–94.
12. Sreedevi A, Cherkil S, Kuttikattu DS, Kamalamma L, Oldenburg B. (2016). Validation of WHOQOL-BREF in Malayalam and Determinants of Quality of Life Among People With Type 2 Diabetes in Kerala , India, *Asia-Pacific Journal of Public Health*, 28(1s):62S–69S.
13. Athanasia K. Papazafropoulou, Florentia Bakomitrou, Aikaterini Trikillinou et al.(2018). Diabetes- dependent quality of life ( ADDQOL ) and affecting factors in patients with diabetes mellitus type 2 in Greece. *BioMed Central*,10(23):4–9.
14. Hayek AA Al, Robert AA, Saeed A Al, Alzaid AA, Sabaan FS Al.(2014). Factors Associated with Health-Related Quality of Life among Saudi Patients with Type 2 Diabetes Mellitus : A Cross-Sectional Survey, , *Diabetes and Metabolism Journal*, 38:220–9.
15. Anderson BJ, Laffel LM, Domenger C, Danne T, Phillip M, Mazza C, et al.(2017). Factors Associated With Diabetes- Specific Health-Related Quality of Life in Youth With Type 1 Diabetes : The Global TEENs Study, *Diabetes Care*, 40:1002–9.
16. Anne-Marie L Wegeberg, Theresa Meldgaard, Sofie Hyldahl et al.(2019). Physical and psychological health domains of quality of life in type 2 diabetic patients in relation to clinical factors of diabetes mellitus in Egypt, 10(2):87–95.
17. Gredig D, Bartelsen-raemy A.(2017). Diabetes-related stigma affects the quality of life of people living with

- 1  
2 diabetes mellitus in Switzerland: implications for healthcare providers, *Health and social care in the*  
3 *community*, 25(5):1620–33.  
4  
5 18. Chen HCLZX.(2017). Effect of exercise on the quality of life in type 2 diabetes mellitus: a systematic review.  
6 *Diabetol Metab Syndr*,26(3):515–30.  
7  
8 19. Porojan M, Poantă L, Fodor D.(2009). Health-Related Quality of Life of Diabetic Patients, *Romanian journal of*  
9 *internal medicine*, 47(4):409–13.  
10  
11 20. FMOH. Ethiopian National Guideline on Major NCDs (2016). Guidelines on Clinical and Programmatic  
12 Management of Major Non Communicable Diseases. *Diabetology & Metabolic Syndrome*.  
13  
14 21. Reba K, Argaw Z, Bizuayehu Wale, Hordofa Gutema.(2018). Health related quality of life of patients with  
15 diagnosed type 2 diabetes in Felege Hiwot Referral Hospital , North West Ethiopia : a cross sectional study.  
16 *BioMed Central*,10(23):4–9.  
17  
18 22. Cronbach, L. J. (1951). Coefficient alpha and the internal structure of tests. *Psychometrika*, 16, 297–334.  
19  
20 23. John E. Ware, Cathy Donald Sherbourne (1992). The MOS 36-Item Short-Form Health Survey (SF-36).*Medical*  
21 *care*, 30(6):473-483.  
22  
23 24. Zheng Y, Ley SH, Hu FB.(2017) Global aetiology and epidemiology of type 2 diabetes mellitus and its  
24 complications. *Nature Publishing Group*,14(2):88–98.  
25  
26 25. Venkataraman K, Tai ES, Tock T, Hospital S, Teck K, Hospital P.(2013). Associations between complications  
27 and health-related quality of life in individuals with diabetes, *Clinical Endocrinology*, 78:865–73.  
28  
29 26. Wegeberg AL, Meldgaard T, Hyldahl S, Jakobsen PE, Drewes AM, Brock B, et al.(2019). Quantities of  
30 comorbidities affects physical, but not mental health related quality of life in type 1 diabetes with confirmed  
31 polyneuropathy, *World Journal of Diabetes*, 10(2):87–95.  
32  
33 27. Kakhki AD, Abed Z.(2013). Health-Related Quality of Life of Diabetic Patients in Tehran, *International*  
34 *Journal of Endocrinology and Metabolism*, 11(4):1–6.  
35  
36 28. R Daya, Zbayat FJR.(2018). Effects of diabetes mellitus on health-related quality of life at a tertiary hospital in  
37 South Africa : A cross-sectional study. *Diabetol Metab Syndr*,10(23):918–28.  
38  
39 29. Core MA Del, Ahn J, Wukich DK, Liu GT, Lalli T, Vanpelt MD, et al. (2018). Gender Differences on SF-36  
40 Patient-Reported Outcomes of Diabetic Foot Disease,*Clinical and Translational Research*, 1–7. DOI:  
41 10.1177/1534734618774664.  
42  
43 30. Wändell PE.(2018). Quality of life of patients with diabetes mellitus An overview of research in primary health  
44 care in the Nordic countries. *Diabetol Metab Syndr*,10(23).  
45  
46 31. Wasif Gillani, Irfan Altaf Ansari, Hisham A. Zaghloul et al.(2018). Bridging glycated hemoglobin with quality  
47 of life and health state ; a randomized case – control study among type 2 diabetes patients. *BioMed*  
48 *Central*,10(23):1–10.  
49  
50 32. Qin W, Blanchette JE, Murrock C.(2019). Exploring the Relationship Between Lifestyle Behaviors and Health-  
51 Related Quality of Life Among Older Adults With Diabetes, *The Diabetes Educator*, 45(1):96–104.  
52  
53 33. Muze M, Hailu E, Woldemichael K, Fekecha B et al.(2018). Health Related Quality of Life And its Associated  
54 Factors Among Diabetic Patients Attending Diabetes Clinic in Jimma University Teaching Hospital. *Diabetol*  
55 *Metab Syndr*,10(23):7–11.  
56  
57  
58  
59  
60

- 1  
2 34. Tang TS, Funnell MM, Anderson RM.(2008). Social Support , Quality of Life , and Self-Care Behaviors  
3 Among African Americans With Type 2 Diabetes, The Diabetes Educator, 34(2).  
4  
5  
6  
7  
8  
9  
10  
11  
12  
13  
14  
15  
16  
17  
18  
19  
20  
21  
22  
23  
24  
25  
26  
27  
28  
29  
30  
31  
32  
33  
34  
35  
36  
37  
38  
39  
40  
41  
42  
43  
44  
45  
46  
47  
48  
49  
50  
51  
52  
53  
54  
55  
56  
57  
58  
59  
60

For peer review only

## Annexes

### Annex I

Table showing correlation matrix of the eight domains among *diabetic patients on follow up at NSH, East Wollega , West Ethiopia, 2019,(n=215)*

| Correlation Matrix |       |       |       |       |       |       |       |       |               |
|--------------------|-------|-------|-------|-------|-------|-------|-------|-------|---------------|
|                    | PF    | RP    | VT    | MH    | BP    | GH    | RE    | SF    | Overall HRQoL |
| PF                 | 1.000 |       |       |       |       |       |       |       |               |
| RP                 | .631  | 1.000 |       |       |       |       |       |       |               |
| VT                 | .089  | .127  | 1.000 |       |       |       |       |       |               |
| MH                 | .125  | .208  | .294  | 1.000 |       |       |       |       |               |
| BP                 | .043  | .092  | -.018 | -.002 | 1.000 |       |       |       |               |
| GH                 | .455  | .511  | .133  | .113  | -.030 | 1.000 |       |       |               |
| RE                 | .380  | .683  | .071  | .191  | .034  | .274  | 1.000 |       |               |
| SF                 | .590  | .640  | .166  | .276  | .042  | .549  | .327  | 1.000 |               |
| Overall HRQoL      | .763  | .916  | .207  | .301  | .128  | .637  | .747  | .765  | 1.000         |

### Annex II

Table showing the two component summary measures derived from principal component analysis for HRQoL among diabetic patients at NHS, western Ethiopia, 2019, (n=215).

| Domains              | Component 1 (PCS) | Component 2 (MCS) |
|----------------------|-------------------|-------------------|
| Physical functioning | 0.83              |                   |
| Role physical        | 0.85              |                   |
| Vitality             |                   | 0.81              |
| Mental Health        |                   | 0.79              |
| General health       | 0.75              |                   |
| Bodily pain          | 0.93              |                   |
| Social functioning   |                   | 0.83              |
| Role emotional       |                   | 0.68              |

# BMJ Open

## Predictors of health-related quality of life among diabetic patients on follow up at Nekemte Specialized Hospital, Western Ethiopia: A cross sectional study

|                                 |                                                                                                                                                                                                                                                                                                   |
|---------------------------------|---------------------------------------------------------------------------------------------------------------------------------------------------------------------------------------------------------------------------------------------------------------------------------------------------|
| Journal:                        | <i>BMJ Open</i>                                                                                                                                                                                                                                                                                   |
| Manuscript ID                   | bmjopen-2019-036106.R3                                                                                                                                                                                                                                                                            |
| Article Type:                   | Original research                                                                                                                                                                                                                                                                                 |
| Date Submitted by the Author:   | 01-Jun-2020                                                                                                                                                                                                                                                                                       |
| Complete List of Authors:       | Feyisa, Bikila; Wollega University, Department of Public Health, Institute of Health Sciences<br>Yilma, Mekdes; Wollega University, Department of Public Health, Institute of Health Sciences<br>Tolessa, Belachew; Wollega University, Department of Public Health, Institute of Health Sciences |
| <b>Primary Subject Heading</b>: | Diabetes and endocrinology                                                                                                                                                                                                                                                                        |
| Secondary Subject Heading:      | Public health, Diabetes and endocrinology, Patient-centred medicine, Renal medicine                                                                                                                                                                                                               |
| Keywords:                       | DIABETES & ENDOCRINOLOGY, Diabetic nephropathy & vascular disease < DIABETES & ENDOCRINOLOGY, Diabetic neuropathy < DIABETES & ENDOCRINOLOGY, Diabetic retinopathy < DIABETES & ENDOCRINOLOGY                                                                                                     |
|                                 |                                                                                                                                                                                                                                                                                                   |

SCHOLARONE™  
Manuscripts



I, the Submitting Author has the right to grant and does grant on behalf of all authors of the Work (as defined in the below author licence), an exclusive licence and/or a non-exclusive licence for contributions from authors who are: i) UK Crown employees; ii) where BMJ has agreed a CC-BY licence shall apply, and/or iii) in accordance with the terms applicable for US Federal Government officers or employees acting as part of their official duties; on a worldwide, perpetual, irrevocable, royalty-free basis to BMJ Publishing Group Ltd ("BMJ") its licensees and where the relevant Journal is co-owned by BMJ to the co-owners of the Journal, to publish the Work in this journal and any other BMJ products and to exploit all rights, as set out in our [licence](#).

The Submitting Author accepts and understands that any supply made under these terms is made by BMJ to the Submitting Author unless you are acting as an employee on behalf of your employer or a postgraduate student of an affiliated institution which is paying any applicable article publishing charge ("APC") for Open Access articles. Where the Submitting Author wishes to make the Work available on an Open Access basis (and intends to pay the relevant APC), the terms of reuse of such Open Access shall be governed by a Creative Commons licence – details of these licences and which [Creative Commons](#) licence will apply to this Work are set out in our licence referred to above.

Other than as permitted in any relevant BMJ Author's Self Archiving Policies, I confirm this Work has not been accepted for publication elsewhere, is not being considered for publication elsewhere and does not duplicate material already published. I confirm all authors consent to publication of this Work and authorise the granting of this licence.

1  
2  
3  
4 1 **Predictors of health-related quality of life among diabetic patients on follow up at Nekemte**  
5  
6 2 **Specialized Hospital, Western Ethiopia: A cross sectional study**  
7  
8 3 **Bikila Regassa Feyisa\*<sup>1</sup>, Mekdes Tigistu Yilma<sup>1</sup>, Belachew Etana Tolessa<sup>1</sup>**  
9  
10 4

11  
12 5 **Corresponding author**  
13

14 6 **Bikila Regassa Feyisa**, Department of Public Health, Institute of Health Sciences, Wollega  
15  
16 7 University, Nekemte, Ethiopia, P.O. Box: 395

17  
18 8 Tell: (+251)927 48 82 35

19  
20  
21 9 Email: [bikregasa@gmail.com](mailto:bikregasa@gmail.com), ORCID ID: 0000-0002-7191-0218  
22

23  
24 10 **Affiliation:** <sup>1</sup> Department of Public health, Institute of Health Sciences, Wollega University,  
25  
26 11 Ethiopia, P.O. Box: 395

27 12 MT:[mekdestigistu10@gmail.com](mailto:mekdestigistu10@gmail.com); ORCID ID: 00 00000216246529  
28

29  
30 13 BE:[ba.etana@gmail.com](mailto:ba.etana@gmail.com); ORCID ID: 0000-0001-9296-2095  
31

32 14  
33  
34  
35  
36  
37  
38  
39  
40  
41  
42  
43  
44  
45  
46  
47  
48  
49  
50  
51  
52  
53  
54  
55  
56  
57  
58  
59  
60

## Abstract

**Objective:** To assess health-related quality of life (HRQoL) and its predictors among diabetic patients on follow up at Nekemte Specialized Hospital (NSH) in Western Ethiopia.

**Design, setting and participants:** This facility based cross sectional study was conducted among 224 patients with diabetes mellitus (types I and II) on follow up at one of the public hospitals in western Ethiopia. Respondents were selected by systematic random sampling and interviewed with the aid of a structured questionnaire.

**Main outcome measured:** HRQoL was measured by using the Medical outcomes study (MOS) 36-item Short Form (SF-36) Health Survey from 15<sup>th</sup> April to 5<sup>th</sup> June, 2019. A structured questionnaire was used for data collection from participants selected by systematic random sampling. Multiple linear regression was used for the final model.

**Result:** A total of 215 diabetic patients consented and completed the study, giving a response rate of 96%. The mean score of the overall HRQoL of the study participants was  $50.3 \pm 18.1$ . The highest mean score was obtained in the physical functioning domain and the lowest mean score in the general health domain. Age, education status, history of smoking, feeling of stigmatization and body-mass index (BMI) were inversely associated with the overall HRQoL. Gender (male), marital status (currently married), absence of co morbidity and absence of chronic complications related to diabetes mellitus were positively associated with overall HRQoL.

**Conclusion:** The overall HRQoL of diabetic patients on follow up at the study area was found to be moderate. General health, mental health, bodily pain and vitality were the most affected domains. Both the mental and physical components need to be considered when caring for the diabetic patients on follow up beyond provision of treatment.

**Key words:** diabetic patients, health related quality of life, Nekemte

## Strength and limitations of this study

- To the best of the authors' knowledge, the study was the first to explore the predictors of health-related quality of life (HRQoL) among patients with types I and II diabetes mellitus in Ethiopia.
- We used an established tool with good psychometric properties.
- No comparison was made between types I and II diabetes mellitus.
- The study had a cross sectional design that could make it difficult to identify whether cause or effect happened first.

## Introduction

Diabetes Mellitus (DM) refers to a group of common metabolic disorders that share the phenotype of hyperglycemia. Several distinct types of DM exist and are caused by complex interactions of genetics and environmental factors. The two broad categories of DM are designated as type I and type II DM. It is characterized by chronic high blood glucose level ( $>126$  mg/dl for fasting blood sugar and/or a 2-hour postprandial glucose of  $\geq 200$  mg/dl or if the individual had symptoms of diabetes and a random plasma glucose  $\geq 200$  mg/dl (confirmed by repeat testing) [1-3].



1  
2 1 Diabetes mellitus is becoming a growing problem that has significant impact on health status and quality of life. It is  
3 2 considered an urgent public health problem, which can influence the HRQoL negatively [2, 3]. Worldwide, 8.8 % of  
4 3 adults aged 20-79 years had diabetes in 2015 which was projected to reach 366 million in 2030 and 642 million (one  
5 4 in ten adults) by 2040, among which about 75% lived in low- and middle-income countries. Globally about 5  
6 5 million deaths among those aged 20-99 years were attributable to diabetes [4-7]. There is now a consensus that the  
7 6 health of the general population cannot be well characterized from the analyses of mortality and morbidity statistics  
8 7 alone and that there is also a need to consider health in terms of people's assessment of their sense of wellbeing and  
9 8 ability to perform social roles [7-9].

10 9 Health-related quality of life (HRQoL) is a multidimensional concept that focuses on the impact of illness and  
11 10 treatment on patients, and it can measure patients' perceptions of illness and treatment, their perceived needs for  
12 11 healthcare providers and their preferences for treatment and outcomes of the disease [10]. It concerns both  
13 12 subjective and objective measurements of individuals. It has been defined as "an overall general well-being that  
14 13 comprises objective descriptors and subjective evaluations of physical, material, social, and emotional well-being  
15 14 together with the extent of personal development and purposeful activity, all weighted by a personal set of values  
16 15 [11].

17 16 Diabetes Mellitus negatively influences HRQoL. This negative influence affects many aspects of a person's life,  
18 17 including the psychological impact of being chronically ill, dietary restrictions, changes in social life, symptoms of  
19 18 an inadequate metabolic system, chronic complications and in due course lifelong infirmities [12-15]. Studies have  
20 19 indicated that the HRQoL of patients with DM is decreased by different domains of HRQoL such as role limitation  
21 20 due to the disease, emotional disturbances, pain, and fatigability. Other factors related to HRQoL among diabetic  
22 21 patients also affect both quality and length of life of patients with DM. These are socio demographics and economic  
23 22 status, behavioral, clinical and social related factors [16, 17]. Diabetes mellitus permanently changes the patient's  
24 23 lifestyle. Daily self-care, consisting of daily insulin injections or oral anti diabetic agents, self-monitoring of blood  
25 24 glucose and diabetic recommended diet has an impact on HRQoL. Moreover, the acute and chronic complications  
26 25 which might develop in due course affect the patients' HRQoL [18, 19].

27 26 In Ethiopia, even though programs have been launched regarding chronic disease management, prevention,  
28 27 screening, diagnosis, treatment and care, little is emphasized on factors that affect the HRQoL among patients. The  
29 28 Ethiopian National Guideline on Major NCDs lacks the specific areas of HRQoL dimension which is affected by the  
30 29 disease. The existing articles and reviews have tried to indicate the epidemiology, complications, therapies,  
31 30 comparisons of treatments and health strategies but the data regarding predictors of HRQoL and how much it is  
32 31 actually affected by the condition is scarce [20]. Therefore, the study was designed to predict the level of health-  
33 32 related quality of life and factors associated with it among diabetic patients in Nekemte Specialized Hospital.

## 1 **Research Design and Method**

### 2 **Study Design and setting**

3 Facility based cross sectional study design was employed from 15<sup>th</sup> April to 5<sup>th</sup> June, 2019. The study was conducted  
4 among diabetic patients on follow up at Nekemte Specialized Hospital (NSH) which is found in Nekemte City  
5 located in Western Ethiopia and 331 km away from the capital city of Ethiopia, Addis Ababa.

6 Diabetic follow up and care services started separately as chronic diseases clinic at the Hospital in 2010 with 96  
7 cases. According to the unpublished report of NSH on the 1<sup>st</sup> February, 2019, 591 diabetic patients of both types I  
8 and II were on follow up at the chronic disease clinic.

### 9 **Eligibility criteria**

10 All known DM patients of type I and type II who have been on follow up for at least one-year duration and age  
11 greater than 18 years at NSH were included while diabetic patients of both types who could not respond to the  
12 interview because of very serious illness were excluded from the study.

### 13 **Sample size and sampling procedure**

14 The sample size was determined assuming normally distributed independent means. The overall mean score of  
15  $52.6 \pm 12.1$  obtained from a study on HRQoL of patients with diagnosed type 2 diabetes in Ethiopia [21] was used to  
16 calculate the sample size for the first objective. Sample size for the second objective was calculated using the mean  
17 of the independent variables from different studies. The calculated sample sizes were compared for the maximum  
18 value with assumption of 95% CI ( $Z_{\alpha/2} = 1.96$ ) and 5% marginal error. After using correction formula and adding  
19 5% non-response rate, the final sample size became 224.

20 Systematic random sampling was used to select the study participants. The sampling interval was calculated by  
21 dividing the total number of diabetic patients on follow up as counted from the registries by the calculated sample  
22 size.

### 23 **Data collection procedure**

24 Data was collected using an interviewer administered structured questionnaire which was adopted from the MOS  
25 36-item short form (SF-36) health survey. The English version of the questionnaire was translated to Afaan Oromoo  
26 (the local language) and translated back to English by other language experts to check its consistency. We recruited  
27 and trained four BSc nurse data collectors and one experienced MPH professional supervisor for the data collection  
28 process.

### 29 **Instruments**

30 The instrument consists of the WHO SF-36 item questionnaires adopted from MOS 36-SF instrument [22] and socio  
31 demographic and economic profiles. The SF-36 consists of 36 questions containing physical functioning (10 items),  
32 role limitation due to physical health (4 items), body pain (2 items), vitality (4 items), social functioning (2 items),  
33 role limitation due to emotional problem (3 items), mental health (5 items) and general health (6 items).

34

## 1 **Data processing analysis**

2 Each item of SF-36 was scored on a linear scale and the negatively worded questions were inversely coded before  
3 analysis. The score of each domain was obtained by summation of the corresponding items. The scores were then  
4 linearly transformed on a 0-100 scale. Mean scores were then adjusted to make the domain scores comparable with  
5 the scores used in the MOS (0-100) (lower scores denote lower quality of life).

6 Aggregate component scores were calculated by principal component analysis (PCA) after all eight domain scores  
7 were checked. All assumptions were checked prior to running PCA. Components with eigen-value greater than 1  
8 were retained for further analysis. The factor loadings above 0.4 were taken and included in the result. The retained  
9 factors were orthogonally rotated. Finally, two summary scores (subscales), physical component score (PCS) and  
10 mental component score (MCS), were derived from PCA.

11 Dummy variables were created for categorical variables that have more than two categories like marital status,  
12 educational status, age category and the drug regimen.

13 For the internal consistency reliability of the SF-36 items, Cronbach's alpha [23] was checked and found to be 0.876  
14 which was in the acceptable level.

15 Betas ( $\beta$ -Coefficients) were used to interpret the strength of predictors of HRQoL. The degree of association  
16 between pairs of variables was measured by Pearson's correlation coefficient ( $r$ ). The independent variables at  $P <$   
17 0.05 were considered as statistically significant. Multicollinearity was checked using variance inflation factors  
18 (VIFs). The maximum value for VIF was 2.3.

## 19 **Patient and Public involvement**

20 No patients nor the public were involved in the design, analysis and interpretation of this study and will not be  
21 involved in the dissemination of the results.

## 22 **Results**

### 23 **Socio demographic characteristics**

24 A total of 215 diabetic patients on follow up at NSH were included in the analysis with response rate of 96%.  
25 Among the total respondents, 122 (56.7%) of them were males and the mean age of all the respondents was  $41.6 \pm$   
26 15.4 years, 141 (65.6%) of them were resident in the urban area. More than two-thirds, 146 (67.9%) of the total  
27 respondents were married and majority, 198 (92.1%) of them were Oromo. The mean family size of the respondents  
28 was  $4.8 \pm 1.5$ . Thirty-eight (17.7%) of the study participants could not read and write and only 52 (24.2%) of them  
29 were employed either at government and/or nongovernmental organizations (**Table 1**).

1  
2  
3  
4  
5  
6  
7  
8  
9  
10  
11  
12  
13  
14  
15  
16  
17  
18  
19  
20  
21  
22  
23  
24  
25  
26  
27  
28  
29  
30  
31  
32  
33  
34  
35  
36  
37  
38  
39  
40  
41  
42  
43  
44  
45  
46  
47  
48  
49  
50  
51  
52  
53  
54  
55  
56  
57  
58  
59  
60

1 Table 1: Socio demographic and socio-economic characteristics of diabetic patients on follow up at NSH,  
2 Nekemte, East Wollega, West Ethiopia, (n=215).

| Variables                             | Frequency (n=215) | Percentage |
|---------------------------------------|-------------------|------------|
| <b>Sex</b>                            |                   |            |
| Male                                  | 122               | 56.7       |
| Female                                | 93                | 43.3       |
| <b>Mean age in year</b>               | 41.6 (± SD 15.4)  |            |
| <b>Residence</b>                      |                   |            |
| Urban                                 | 141               | 65.6       |
| Rural                                 | 74                | 34.4       |
| <b>Marital status</b>                 |                   |            |
| Married                               | 146               | 67.9       |
| Single                                | 42                | 19.5       |
| Divorced                              | 6                 | 2.8        |
| Widowed                               | 21                | 9.8        |
| <b>Ethnicity</b>                      |                   |            |
| Oromo                                 | 198               | 92.1       |
| Amhara                                | 9                 | 4.2        |
| Guraghe                               | 5                 | 2.3        |
| Other <sup>a</sup>                    | 3                 | 1.4        |
| <b>Educational status</b>             |                   |            |
| Cannot read and write                 | 38                | 17.7       |
| Grade 1-8                             | 63                | 29.3       |
| Grade 9-12                            | 50                | 23.3       |
| College/University                    | 64                | 29.8       |
| <b>Occupation</b>                     |                   |            |
| Government/NGO employee               | 52                | 24.2       |
| Merchant                              | 23                | 10.7       |
| Farmer                                | 41                | 19.1       |
| Housewife                             | 46                | 21.4       |
| Retired                               | 23                | 10.7       |
| Other <sup>b</sup>                    | 30                | 14.0       |
| <b>Economic status (Wealth index)</b> |                   |            |
| Poorest                               | 43                | 20.0       |
| Poor                                  | 38                | 17.7       |
| Medium                                | 46                | 21.4       |
| Wealthy                               | 45                | 20.9       |
| Wealthiest                            | 43                | 20.0       |

<sup>a</sup>Other (Tigre, Silte)    <sup>b</sup>Other (Student, carpenter)

#### 4 Medical history and health condition

5 More than half, 125 (58.1%) of the study participants had type 2 diabetes mellitus. Almost half, 108 (50.2%) of  
6 them had been diagnosed within the last five years. Regarding treatment, 99 (46.0%) of the patients were using only  
7 insulin while 93 (43.3%) and 23 (10.7%) were using oral hypoglycemic agents and both insulin and oral  
8 hypoglycemic agents respectively.

9 Nearly half, 103 (47.9%) of the study participants were co morbid and hypertension accounted for 85 (82.5%) of co-  
10 morbid conditions. Sixty-three (29.3%) of the study participants had diabetes-related acute complications which

1 included diabetes keto acidosis (DKA), 40 (63.5%), Hypoglycemia 20 (31.7%) and non ketotic hyperosmolar state  
 2 3(4.8%) respectively. Sixty-nine of the study subjects had diabetes related chronic complications which accounted  
 3 for around 32.1% where diabetic neuropathy (including foot ulcer, peripheral pain, and gangrene) covered almost  
 4 half, 49.3% as illustrated in **table 2**.

5 Table 2: Medical history and health condition of diabetic patients on follow up at NSH, Nekemte, East Wollega,  
 6 West Ethiopia, (n=215).

| Variable                                                 | Frequency (n) | Percent (%) |
|----------------------------------------------------------|---------------|-------------|
| <b>Duration of DM (years)</b>                            |               |             |
| <5                                                       | 108           | 50.2        |
| 6-10                                                     | 59            | 27.4        |
| 11-15                                                    | 32            | 14.9        |
| >15                                                      | 16            | 7.4         |
| <b>Drug regimen</b>                                      |               |             |
| Insulin only                                             | 99            | 46.0        |
| Oral hypoglycemic agents                                 | 93            | 43.3        |
| Insulin and oral hypoglycemic agents                     | 23            | 10.7        |
| <b>Presence of co morbidity</b>                          |               |             |
| Yes                                                      | 103           | 47.9        |
| No                                                       | 112           | 52.1        |
| <b>Presence of diabetic related chronic complication</b> |               |             |
| Yes                                                      | 69            | 32.1        |
| No                                                       | 146           | 67.9        |
| <b>Types of acute complications</b>                      |               |             |
| DKA                                                      | 40            | 63.5        |
| Hypoglycemia                                             | 20            | 31.7        |
| Non ketotic hyperosmolar state                           | 3             | 4.8         |
| <b>Type of chronic complication</b>                      |               |             |
| Diabetic neuropathy                                      | 34            | 49.3        |
| Diabetic Retinopathy                                     | 19            | 27.5        |
| Diabetic nephropathy                                     | 14            | 20.3        |
| Other                                                    | 2             | 2.9         |
| <b>Body mass index (BMI) (kg/m<sup>2</sup>)</b>          |               |             |
| <18.5                                                    | 5             | 2.3         |
| 18.5-25                                                  | 122           | 56.7        |
| 25-30                                                    | 80            | 37.2        |
| >30                                                      | 8             | 3.7         |

## 7 **Health related quality of life of the study participants**

8 The transformed mean score of the overall HRQoL of the study participants was found to be  $50.3 \pm 18.1$  with  
 9 minimum and maximum scores of 16.4 and 79.1 respectively. Among the eight domains of HRQoL, the study  
 10 participants scored highest ( $63.2 \pm 34.4$ ) mean score in physical functioning and lowest ( $30.2 \pm 22.9$ ) mean score in  
 11 general health domain. When analyzing the HRQoL by domains general health, mental health, bodily pain and  
 12 vitality had mean score below 50 indicating that they were the most affected domains among the diabetic patients  
 13 (**Table 3**).

Two component scores of the HRQoL were generated by PCA with the total variance explained 66.8%. Physical functioning, physical role limitation, general health and bodily pain dimension scales correlate most highly with the physical component of HRQoL. Moreover, the mental health component of HRQoL correlates most highly with mental health, social functioning, emotional role limitation and vitality (**Annex I and II**). The higher mean score was found for the mental component score ( $51.8 \pm 16.7$ ) with the maximum score of 80.8.

Table 3: HRQoL of diabetic patients at NSH, East Wollega, West Ethiopia, (n=215).

| Domains of HRQoL, Overall HRQoL, PCS and MCS  | Mean  | SD   | Minimum score (%) | Maximum score (%) |
|-----------------------------------------------|-------|------|-------------------|-------------------|
| Physical Functioning (PF)                     | 63.2  | 34.4 | 14.4              | 97.6              |
| Role limitation due to physical health (RP)   | 53.4  | 44.8 | 8.6               | 98.2              |
| Role limitation due to emotional problem (RE) | 52.77 | 45.8 | 6.97              | 98.6              |
| Energy/Fatigue (Vitality, VT)                 | 48.5  | 7.8  | 20.0              | 75.0              |
| Emotional wellbeing (Mental Health, MH)       | 49.8  | 8.0  | 20.0              | 72.0              |
| Social Functioning (SF)                       | 56.0  | 30.1 | 12.9              | 86.0              |
| Bodily Pain (BP)                              | 48.6  | 11.0 | 12.5              | 80.0              |
| General Health (GH)                           | 30.2  | 22.9 | 7.3               | 95.0              |
| Overall HRQoL                                 | 50.3  | 18.1 | 16.4              | 79.1              |
| Physical Component Score (PCS)                | 48.8  | 21.9 | 10.0              | 87.5              |
| Mental Component Score (MCS)                  | 51.8  | 16.7 | 19.8              | 80.8              |

7

### 8 Predictors of health-related quality of life of diabetic patients

9 The multiple linear regression model indicated that a unit increase in age would likely decrease health related quality of life of diabetic patients by 0.25 ( $\beta=-0.25$ , 95% CI, -0.43 to -0.07,  $p=0.007$ ) controlling all other independent variables.

12 Males had about five times better HRQoL when compared to females ( $\beta=5.23$ , 95% CI, 1.10-9.36,  $p=0.013$ ). Respondents who were married had about five times better HRQoL compared to those who were single controlling for all other independent variables ( $\beta=5.30$ , 95% CI, 1.88-10.52,  $P=0.04$ ).

15 Respondents who were unable to read and write had about nine times lower HRQoL ( $\beta=-8.81$ , 95% CI, -14.88 to -2.82,  $P=0.004$ ) when compared to those who achieved college and above after controlling all other predictors.

17 History of smoking was found to affect the HRQoL status of the diabetic patients. Diabetic patients who had history of smoking had nine units times lower HRQoL ( $\beta=-9.03$ , 95% CI, -15.23- -4.69,  $P<0.001$ ) when compared to their counterparts. Similarly, feelings of stigmatization because of being a diabetic patient would likely decrease HRQoL by 5.25 units ( $\beta=-5.25$ , 95% CI, -8.94 to -1.56,  $P=0.005$ ) compared to their counterparts.

1  
2 1 Absence of co-morbid conditions and chronic complications related to diabetes mellitus was found to increase  
3 2 HRQoL. In both cases, those who had not had the condition had about six units better HRQoL than their  
4 3 counterparts. A one-unit increase in the BMI would likely decrease the HRQoL by 3.56 units ( $\beta=-3.56$ , 95% CI, -  
5 4 6.94 to -0.18, P=0.040) **Table 4**

5 Table 4: Multiple linear regression analysis of diabetic patients on follow up at NSH, East Wollega, West  
6 Ethiopia, (n=215)

| Variables                          | Unstandardized Coefficient |       | Standardized Coefficient | 95% CI |       | P-value        |
|------------------------------------|----------------------------|-------|--------------------------|--------|-------|----------------|
|                                    | B                          | SE    |                          | Lower  | Upper |                |
| <b>(Constant)</b>                  | 69.41                      | 10.31 |                          | 49.16  | 89.74 | 0.000          |
| <b>Sex</b>                         |                            |       |                          |        |       |                |
| Female                             | 1                          | 1     | 1                        | 1      | 1     | 1              |
| Male                               | 5.23                       | 2.11  | 0.14                     | 1.10   | 9.36  | <b>0.013*</b>  |
| <b>Age</b>                         | -0.25                      | 0.08  | -0.20                    | -0.43  | -0.07 | <b>0.007*</b>  |
| <b>Marital status</b>              |                            |       |                          |        |       |                |
| Single                             | 1                          | 1     | 1                        | 1      | 1     | 1              |
| Married                            | 5.30                       | 2.69  | 0.11                     | 1.88   | 10.52 | <b>0.04*</b>   |
| Divorced                           | -4.60                      | 5.26  | -0.04                    | -14.98 | 5.78  | 0.38           |
| Widowed                            | -4.07                      | 3.42  | -0.07                    | -10.81 | 2.67  | 0.24           |
| <b>Educational status</b>          |                            |       |                          |        |       |                |
| Cannot read and write              | -8.81                      | 3.06  | -0.19                    | -14.88 | -2.82 | <b>0.004*</b>  |
| Grade 1-8                          | -2.94                      | 2.49  | -0.07                    | -7.84  | 1.97  | 0.24           |
| Grade 9-12                         | 0.04                       | 2.62  | 0.001                    | -5.13  | 5.22  | 0.98           |
| College and above                  | 1                          | 1     | 1                        | 1      | 1     | 1              |
| <b>Smoking history</b>             |                            |       |                          |        |       |                |
| Yes                                | -9.03                      | 2.66  | -0.21                    | -15.23 | -4.69 | <b>0.001**</b> |
| No                                 | 1                          | 1     | 1                        | 1      | 1     | 1              |
| <b>Feeling of stigmatized</b>      |                            |       |                          |        |       |                |
| Yes                                | -5.25                      | 1.89  | -0.15                    | -8.94  | -1.56 | <b>0.005*</b>  |
| No                                 | 1                          | 1     | 1                        | 1      | 1     | 1              |
| <b>Co morbidity status</b>         |                            |       |                          |        |       |                |
| Yes                                | 1                          | 1     | 1                        | 1      | 1     | 1              |
| No                                 | 6.05                       | 2.18  | 0.16                     | 1.78   | 10.33 | <b>0.006*</b>  |
| <b>Chronic complication status</b> |                            |       |                          |        |       |                |
| Yes                                | 1                          | 1     | 1                        | 1      | 1     | 1              |
| No                                 | 6.04                       | 2.28  | 0.11                     | 1.54   | 10.53 | <b>0.009*</b>  |
| <b>BMI</b>                         | -3.56                      | 1.71  | -0.12                    | -6.94  | -0.18 | <b>0.040*</b>  |
| <b>DM Duration</b>                 | 0.15                       | 1.10  | 0.01                     | -2.02  | 2.33  | 0.89           |
| <b>Types of DM</b>                 |                            |       |                          |        |       |                |
| Type 1                             | 1                          | 1     | 1                        | 1      | 1     | 1              |
| Type 2                             | 4.45                       | 2.39  | 0.12                     | -0.24  | 9.17  | 0.064          |
| <b>Drug regimen</b>                |                            |       |                          |        |       |                |
| Insulin only                       | 1                          | 1     | 1                        | 1      | 1     | 1              |
| OHA                                | -5.66                      | 3.46  | -0.16                    | -12.48 | 1.15  | 0.103          |
| Both                               | -1.42                      | 4.02  | -0.02                    | -9.35  | 6.51  | 0.72           |

7 Dependent Variable: Overall health related quality of life.

## Discussion

The current study assessed the overall health-related quality of life among patients with type I and type II diabetes mellitus and its predictors in Nekemte specialized hospital.

According to this finding, the transformed overall mean score of the HRQoL was found to be moderate. The highest mean score was recorded in the physical functioning domain. Domains of general health, mental health, bodily pain and vitality had mean score below the average. This was lower when compared to the results obtained in other places [12,14, 24]. This discrepancy might be due to the differences in the socioeconomic status of the patients and cultural differences across different regions. But it was congruent with the study result from Felege Hiwot Referral Hospital; Ethiopia [21]. This might be because of the possible similarity of the socioeconomic status of the study areas where the study participants shared almost the same lifestyle and cultural perspectives.

The physical and mental components mean score from the current study was comparable with other studies [13, 25]. However, another study from Tehran hospital [26] indicated that the physical and mental component mean score was relatively higher than that of the present study. The possible explanation for this difference could be the cultural and socio demographic difference of the patients across different study areas. The subjective nature of the HRQoL and the component measurement across different patients might also explain the differences as HRQoL concerns subjective evaluations and also objective descriptors [10, 11].

In this study sex, age, marital status, educational level were among the socio demographic factors that had significant association with the health-related quality of life of patients with diabetes mellitus. For instance, inability to read and write was inversely associated with the HRQoL indicating that diabetic patients who cannot read and write have lower understanding about the disease, complications and treatment as well as being unable to make decisions on better self-care. The study disagreed with the study result from Greece where sex and educational level had not significant association with health-related quality of life [10]. This difference could be because of the difference in socio demographic status of the patients.

As age increases the HRQoL of the diabetic patients decreased. This result was also noted in similar studies [11, 13, 27]. This might be because of the physiological alteration of the patients as they got older. Older individuals are mostly limited in physical activities, coping with pain intensity and relief from pain [26]. However, findings from other parts of Ethiopia, South Africa and the Nordic countries were inconsistent with the current study result where age has no association with HRQoL [21, 28, 29].

Married diabetic patients had higher HRQoL when compared to the single patients. The findings from other parts of Ethiopia also agreed with the current study result [21, 30]. The possible explanation for this could be that the married patients might be psychologically stable and have better social interaction in relation to those who are single.

Male diabetic patients had higher HRQoL mean score when compared to the female patients with the highest domain score of physical functioning and lower in general health in both sexes. This goes in line with other literatures which indicated that women had worse HRQoL than males [11, 31]. But it contradicted with other studies [12, 27, 30]. This discrepancy could be due to the gender impact as most of the time women are treated inferiorly.



1  
2 They are less autonomous in giving decision on behalf of their rights. Moreover, evidences showed that women  
3 were more likely affected by DM than males. The risk of central obesity is higher among women which in turn lead  
4 to the enhancement of the risk of complication of diabetes mellitus. This greatly reduces HRQoL of the clients [1].  
5

6 Although occupation and economic status of patients with diabetes mellitus seems to affect HRQoL, the current  
7 study did not show significant association with HRQoL of diabetic patients. However, there were other studies  
8 showing significant associations between HRQoL and the patients' occupational and economic status [12, 21]. The  
9 discrepancy could be due to the methodological differences. In the studies, economic status was reported just from  
10 the mean annual income of the patients. However, since the patients' way of disclosing their income level might not  
11 be accurate especially for unsalaried patients. This might overestimate the association.  
12  
13  
14  
15

16 In this study, patients who had history of smoking had decreased HRQoL when compared to their counterparts. This  
17 result was supported by the report from CDC and a study from the United States that indicated the direct impact of  
18 smoking altering the health condition of the diabetic patients and reduced their HRQoL [5, 32]. Smokers are more  
19 likely to have central fat accumulation than non-smokers, and smoking is known to induce insulin resistance and  
20 compensatory insulin secretion responses, which could explain the increased risk of diabetes in those who smoke  
21 [22]. But it was not associated factor in other studies [26, 33]. This could likely be because of difference in  
22 methodology.  
23  
24  
25

26 Both co morbidity condition and chronic complication related to diabetic status was found to affect the HRQoL  
27 status which was similar with other studies [14, 15, 24, 21, 34]. This could be due to the fact that co morbid  
28 conditions are another challenge that could put the patients in worrying conditions. Patients might seek health care  
29 for both or above diseases in which case they were emotionally diseased, the role due to emotional problem might  
30 be under question. All the domains of HRQoL directly or indirectly would be affected. In another way, those who  
31 developed chronic complications would also live under the double crisis. In one way, they felt unhappy of being  
32 diabetic patient and in other way they would be under the psychological, physical, emotional, social and spiritual  
33 agony.  
34  
35  
36  
37

38 In this study, the increase in BMI affected HRQoL negatively. But studies from South Africa indicated that there  
39 was no significant association between BMI and HRQoL [13, 28]. This discrepancy could be due to the difference in  
40 the diabetic patients' knowledge gap and practice regarding their lifestyle modification.  
41  
42

43 Feeling of stigmatization of being a diabetic patient was inversely associated with HRQoL. This result goes in line  
44 with other literatures [17]. Because the diabetic patients are living under multiple restrictions, they would likely feel  
45 stigmatized in all aspects of their life. They are often restricted with regard to the amount, type and timing of food  
46 consumed. For example, eating mandatory foods at certain times, waiting for insulin to take effect before eating,  
47 etc. These restrictions may negatively affect an individual's HRQoL and their interaction with people around them,  
48 in their social lives and in the work place.  
49  
50  
51

52 The study had several limitations that have to be put in to consideration when used by other researchers. Since the  
53 study was a cross sectional study design, it is difficult to infer the cause-effect relationship (temporal relation). The  
54 study was facility based which could not be generalized to all diabetic patients in the community. Face-to- face  
55  
56  
57

1  
2 interviews were conducted by considering the different level of education of the participants, which might lead to  
3 the social desirability bias and could overestimate the result. The effect of recall bias also cannot be ruled out.  
4

5  
6 In conclusion, the present study identified that the HRQoL of diabetic patients on follow up at NSH was moderate.  
7 Domains of general health, mental health, bodily pain and vitality were the most affected domains among the  
8 diabetic patients. Sex, age, education status, marital status, history of smoking status, BMI, feeling of stigma status,  
9 co morbidity status and diabetic related chronic complication status were predictors of health-related quality of life  
10 identified in this study.  
11  
12

13 There are several avenues for further research based on the current finding. Longitudinal studies with larger sample  
14 size need to be conducted in order to generalize the overall health related quality of life of diabetic patients at  
15 national level. Moreover, experimental and qualitative study design needs to be considered focusing on lifestyle  
16 modification of diabetic patients.  
17  
18

### 19 20 **Acknowledgements**

21 We are grateful to Wollega University, the study participants, data collectors and all other personnel who contribute  
22 their valuable input for the study to be accomplished.  
23  
24

### 25 **Compliance with ethical standards**

26 **Funding:** This work was financially supported by Wollega University with grant number WU/RD/256/2011.

27 **Conflict of interest:** None declared.

28 **Availability of data:** Data will be available on demand via the corresponding author's address

29 **Ethical approval:** The study received letter of approval from Research Ethics Review Committee (RERC) of  
30 Wollega University, DPH/0081/2011.  
31

32 **Informed consent:** Informed consent was obtained from all individual participants involved in the study.

33 **Authors' contributions:** All authors were contributed from the conception of the study to the final draft of the  
34 manuscript. Material preparation, data collection, analysis and interpretation of the result were carried out by Bikila  
35 Regassa, Mekdes Tigistu and Belachew Etana. The first draft of the manuscript was written by BR and reviewed by  
36 MT and BE. All authors read and approved the final manuscript.  
37

38 **List of acronyms:** HRQoL: Health Related Quality of Life; PCA: Principal Component Analysis, MCS: Mental  
39 Component Score, PCS: Physical Component Score, NHS: Nekemte Specialized Hospital  
40  
41  
42  
43  
44  
45  
46  
47  
48  
49  
50  
51  
52  
53  
54  
55  
56  
57  
58  
59  
60

## References

1. Kasper B. Fauci, Hauser L. Jameson (2005). *Harrisons's Principles of Internal medicine*, 17<sup>th</sup> edidtion, *McGraw-Hill's Access medicine*, pg 2152-2180.
2. American Diabetes Association (2002). Standards of Medical Care for Patients. 25(1):s33–49.
3. Center for disease control and prevention. National Diabetes Fact Sheet , 2008.
4. James P. Boyle, Amanda A. Honeycutt, K.M Venkat Narayan,Thomas J.Hoerger,Linda S.Geiss, Homg Chen, et al. (2001). Projection of Diabetes Burden Through 2050. *Diabetes Care*, 24(11):1936–40.
5. Center for Control and Prevention of diseases. Smoking and diabetes, (2014). Available from:[https://www.cdc.gov/tobacco/data\\_statistics/sgr/50<sup>th</sup> anniversary/pdfs/fs\\_smoking\\_diabetes\\_508.pdf](https://www.cdc.gov/tobacco/data_statistics/sgr/50th_anniversary/pdfs/fs_smoking_diabetes_508.pdf). [cited 28 Mar, 2019]
6. Bommer C, Sagalova V, Heeseemann E, Manne-goehler J, Atun R.(2015). Global Economic Burden of Diabetes in Adults : Projections From 2015 to 2030,*Diabetes Care*, 41:963–70.
7. International Diabetes Federation. IDF Diabetes Atlas (2015): Global estimates of diabetes prevalence for 2017 and projections for 2045. *Diabetology & Metabolic Syndrome. Elsevier B.V.* Available from: <https://doi.org/10.1016/j.diabres.2018.02.023>.
8. Al-shehri AH, Taha AZ, Bahnassy AA, Salah M. (2008). Health-related quality of life in type 2 diabetic patients. *Ann Saudi Med*, 25(5):352–60.
9. Kebede D, Alem A, Shibre T, Deyessa N.(2004). Health related quality of life ( SF-36 ) survey in Butajira , rural Ethiopia : Normative data and evaluation of reliability and validity.*Ethiopian medical journal*, 289–97.
10. Dinesh Khanna JT. (2007). Health-related Quality of Life- An Introduction. *Am J Manag Care*, 13(9):218–23.
11. Goli M, Salarvand S, Dehvan F, Ghafouri H, Dalvand S. (2018). Health-Related Quality of Life in Iranian Patients with Thalassemia Major : A Systematic Review and Meta-Analysis, *Int J Pediatr*, 6(59):8483–94.
12. Sreedevi A, Cherkil S, Kuttikattu DS, Kamamma L, Oldenburg B. (2016). Validation of WHOQOL-BREF in Malayalam and Determinants of Quality of Life Among People With Type 2 Diabetes in Kerala , India, *Asia-Pacific Journal of Public Health*, 28(1s):62S–69S.
13. Athanasia K. Papazaftropoulou, Florentia Bakomitrou, Aikaterini Trikallinou et al.(2018). Diabetes- dependent quality of life ( ADDQOL ) and affecting factors in patients with diabetes mellitus type 2 in Greece. *BioMed Central*, 10(23):4–9.
14. Hayek AA Al, Robert AA, Saeed A Al, Alzaid AA, Sabaan FS Al.(2014). Factors Associated with Health-Related Quality of Life among Saudi Patients with Type 2 Diabetes Mellitus : A Cross-Sectional Survey, , *Diabetes and Metabolism Journal*, 38:220–9.
15. Anderson BJ, Laffel LM, Domenger C, Danne T, Phillip M, Mazza C, et al.(2017). Factors Associated With Diabetes- Specific Health-Related Quality of Life in Youth With Type 1 Diabetes : The Global TEENS Study, *Diabetes Care*, 40:1002–9.

16. Anne-Marie L Wegeberg, Theresa Meldgaard, Sofie Hyldahl et al.(2019). Physical and psychological health domains of quality of life in type 2 diabetic patients in relation to clinical factors of diabetes mellitus in Egypt, *10(2):87–95*.
17. Gredig D, Bartelsen-raemy A.(2017). Diabetes-related stigma affects the quality of life of people living with diabetes mellitus in Switzerland: implications for healthcare providers, *Health and social care in the community*, 25(5):1620–33.
18. Chen HCLZX.(2017). Effect of exercise on the quality of life in type 2 diabetes mellitus: a systematic review. *Diabetol Metab Syndr*,26(3):515–30.
19. Porojan M, Poantă L, Fodor D.(2009). Health-Related Quality of Life of Diabetic Patients, *Romanian journal of internal medicine*, 47(4):409–13.
20. FMOH. Ethiopian National Guideline on Major NCDs (2016). Guidelines on Clinical and Programmatic Management of Major Non Communicable Diseases. *Diabetology & Metabolic Syndrome*.
21. Reba K, Argaw Z, Bizuayehu Wale, Hordofa Gutema.(2018). Health related quality of life of patients with diagnosed type 2 diabetes in Felege Hiwot Referral Hospital , North West Ethiopia : a cross sectional study. *BioMed Central*,10(23):4–9.
22. John E. Ware, Cathy Donald Sherbourne (1992). The MOS 36-Item Short-Form Health Survey (SF-36).*Medical care*, 30(6):473–483.
23. Cronbach, L. J. (1951). Coefficient alpha and the internal structure of tests. *Psychometrika*, 16, 297–334.
24. Venkataraman K, Tai ES, Tock T, Hospital S, Teck K, Hospital P.(2013). Associations between complications and health-related quality of life in individuals with diabetes, *Clinical Endocrinology*, 78:865–73.
25. Zheng Y, Ley SH, Hu FB.(2017) Global aetiology and epidemiology of type 2 diabetes mellitus and its complications. *Nature Publishing Group*,14(2):88–98.
26. Kakhki AD, Abed Z.(2013). Health-Related Quality of Life of Diabetic Patients in Tehran, *International Journal of Endocrinology and Metabolism*, 11(4):1–6.
27. Wegeberg AL, Meldgaard T, Hyldahl S, Jakobsen PE, Drewes AM, Brock B, et al.(2019). Quantities of comorbidities affects physical, but not mental health related quality of life in type 1 diabetes with confirmed polyneuropathy, *World Journal of Diabetes*, 10(2):87–95.
28. R Daya, Zbayat FJR.(2018). Effects of diabetes mellitus on health-related quality of life at a tertiary hospital in South Africa : A cross-sectional study. *Diabetol Metab Syndr*,10(23):918–28.
29. Wändell PE.(2018). Quality of life of patients with diabetes mellitus An overview of research in primary health care in the Nordic countries. *Diabetol Metab Syndr*,10(23).
30. Muze M, Hailu E, Woldemichael K, Fekecha B et al.(2018). Health Related Quality of Life And its Associated Factors Among Diabetic Patients Attending Diabetes Clinic in Jimma University Teaching Hospital. *Diabetol Metab Syndr*,10(23):7–11.
31. Core MA Del, Ahn J, Wukich DK, Liu GT, Lalli T, Vanpelt MD, et al. (2018). Gender Differences on SF-36 Patient-Reported Outcomes of Diabetic Foot Disease,*Clinical and Translational Research*, 1–7. DOI: 10.1177/1534734618774664.
32. Wasif Gillani, Irfan Altaf Ansari, Hisham A. Zaghloul et al.(2018). Bridging glycated hemoglobin with quality

1  
2 of life and health state; a randomized case – control study among type 2 diabetes patients. *BioMed*  
3 *Central*,10(23):1–10.  
4

5 33. Qin W, Blanchette JE, Murrock C.(2019). Exploring the Relationship Between Lifestyle Behaviors and Health-  
6 Related Quality of Life Among Older Adults With Diabetes, *The Diabetes Educator*, 45(1):96–104.  
7

8 34. Tang TS, Funnell MM, Anderson RM.(2008). Social Support , Quality of Life , and Self-Care Behaviors  
9 Among African Americans With Type 2 Diabetes, *The Diabetes Educator*, 34(2).  
10  
11  
12  
13  
14  
15  
16  
17  
18  
19  
20  
21  
22  
23  
24  
25  
26  
27  
28  
29  
30  
31  
32  
33  
34  
35  
36  
37  
38  
39  
40  
41  
42  
43  
44  
45  
46  
47  
48  
49  
50  
51  
52  
53  
54  
55  
56  
57  
58  
59  
60

For peer review only

## Annexes

### Annex I

Table showing correlation matrix of the eight domains among *diabetic patients on follow up at NSH, East Wollega , West Ethiopia, 2019,(n=215)*

| Correlation Matrix |       |       |       |       |       |       |       |       |               |
|--------------------|-------|-------|-------|-------|-------|-------|-------|-------|---------------|
|                    | PF    | RP    | VT    | MH    | BP    | GH    | RE    | SF    | Overall HRQoL |
| PF                 | 1.000 |       |       |       |       |       |       |       |               |
| RP                 | .631  | 1.000 |       |       |       |       |       |       |               |
| VT                 | .089  | .127  | 1.000 |       |       |       |       |       |               |
| MH                 | .125  | .208  | .294  | 1.000 |       |       |       |       |               |
| BP                 | .043  | .092  | -.018 | -.002 | 1.000 |       |       |       |               |
| GH                 | .455  | .511  | .133  | .113  | -.030 | 1.000 |       |       |               |
| RE                 | .380  | .683  | .071  | .191  | .034  | .274  | 1.000 |       |               |
| SF                 | .590  | .640  | .166  | .276  | .042  | .549  | .327  | 1.000 |               |
| Overall HRQoL      | .763  | .916  | .207  | .301  | .128  | .637  | .747  | .765  | 1.000         |

### Annex II

Table showing the two component summary measures derived from principal component analysis for HRQoL among diabetic patients at NHS, western Ethiopia, 2019, (n=215).

| Domains              | Component 1 (PCS) | Component 2 (MCS) |
|----------------------|-------------------|-------------------|
| Physical functioning | 0.83              |                   |
| Role physical        | 0.85              |                   |
| Vitality             |                   | 0.81              |
| Mental Health        |                   | 0.79              |
| General health       | 0.75              |                   |
| Bodily pain          | 0.93              |                   |
| Social functioning   |                   | 0.83              |
| Role emotional       |                   | 0.68              |

STROBE Statement—Checklist of items that should be included in reports of *cross-sectional studies*

|                              | Item No | Recommendation                                                                                                                                                                       | Page No |
|------------------------------|---------|--------------------------------------------------------------------------------------------------------------------------------------------------------------------------------------|---------|
| <b>Title and abstract</b>    | 1       | (a) Indicate the study's design with a commonly used term in the title or the abstract                                                                                               | 1       |
|                              |         | (b) Provide in the abstract an informative and balanced summary of what was done and what was found                                                                                  | 2       |
| <b>Introduction</b>          |         |                                                                                                                                                                                      |         |
| Background/rationale         | 2       | Explain the scientific background and rationale for the investigation being reported                                                                                                 | 3       |
| Objectives                   | 3       | State specific objectives, including any prespecified hypotheses                                                                                                                     | 2       |
| <b>Methods</b>               |         |                                                                                                                                                                                      |         |
| Study design                 | 4       | Present key elements of study design early in the paper                                                                                                                              | 4       |
| Setting                      | 5       | Describe the setting, locations, and relevant dates, including periods of recruitment, exposure, follow-up, and data collection                                                      | 4       |
| Participants                 | 6       | (a) Give the eligibility criteria, and the sources and methods of selection of participants                                                                                          |         |
| Variables                    | 7       | Clearly define all outcomes, exposures, predictors, potential confounders, and effect modifiers. Give diagnostic criteria, if applicable                                             | 4       |
| Data sources/<br>measurement | 8*      | For each variable of interest, give sources of data and details of methods of assessment (measurement). Describe comparability of assessment methods if there is more than one group | N/A     |
| Bias                         | 9       | Describe any efforts to address potential sources of bias                                                                                                                            | 5       |
| Study size                   | 10      | Explain how the study size was arrived at                                                                                                                                            | 4       |
| Quantitative variables       | 11      | Explain how quantitative variables were handled in the analyses. If applicable, describe which groupings were chosen and why                                                         | 5       |
| Statistical methods          | 12      | (a) Describe all statistical methods, including those used to control for confounding                                                                                                | 5       |
|                              |         | (b) Describe any methods used to examine subgroups and interactions                                                                                                                  | N/A     |
|                              |         | (c) Explain how missing data were addressed                                                                                                                                          | N/A     |
|                              |         | (d) If applicable, describe analytical methods taking account of sampling strategy                                                                                                   | 4       |

|                          |     |                                                                                                                                                                                                              |           |
|--------------------------|-----|--------------------------------------------------------------------------------------------------------------------------------------------------------------------------------------------------------------|-----------|
|                          |     | (e) Describe any sensitivity analyses                                                                                                                                                                        | N/A       |
| <b>Results</b>           |     |                                                                                                                                                                                                              |           |
| Participants             | 13* | (a) Report numbers of individuals at each stage of study—eg numbers potentially eligible, examined for eligibility, confirmed eligible, included in the study, completing follow-up, and analysed            | 5         |
|                          |     | (b) Give reasons for non-participation at each stage                                                                                                                                                         | N/A       |
|                          |     | (c) Consider use of a flow diagram                                                                                                                                                                           | N/A       |
| Descriptive data         | 14* | (a) Give characteristics of study participants (eg demographic, clinical, social) and information on exposures and potential confounders                                                                     | 6         |
|                          |     | (b) Indicate number of participants with missing data for each variable of interest                                                                                                                          | N/A       |
| Outcome data             | 15* | Report numbers of outcome events or summary measures                                                                                                                                                         | 8         |
| Main results             | 16  | (a) Give unadjusted estimates and, if applicable, confounder-adjusted estimates and their precision (eg, 95% confidence interval). Make clear which confounders were adjusted for and why they were included | 8 and 9   |
|                          |     | (b) Report category boundaries when continuous variables were categorized                                                                                                                                    | 5         |
|                          |     | (c) If relevant, consider translating estimates of relative risk into absolute risk for a meaningful time period                                                                                             | N/A       |
| Other analyses           | 17  | Report other analyses done—eg analyses of subgroups and interactions, and sensitivity analyses                                                                                                               | N/A       |
| <b>Discussion</b>        |     |                                                                                                                                                                                                              |           |
| Key results              | 18  | Summarise key results with reference to study objectives                                                                                                                                                     | 10        |
| Limitations              | 19  | Discuss limitations of the study, taking into account sources of potential bias or imprecision. Discuss both direction and magnitude of any potential bias                                                   | 11        |
| Interpretation           | 20  | Give a cautious overall interpretation of results considering objectives, limitations, multiplicity of analyses, results from similar studies, and other relevant evidence                                   | 10 and 11 |
| Generalisability         | 21  | Discuss the generalisability (external validity) of the study results                                                                                                                                        | 11        |
| <b>Other information</b> |     |                                                                                                                                                                                                              |           |
| Funding                  | 22  | Give the source of funding and the role of the funders for the present study and, if applicable, for the original study on which the present article is based                                                | 12        |



1  
2  
3  
4  
5 \*Give information separately for exposed and unexposed groups.  
6  
7

8 **Note:** An Explanation and Elaboration article discusses each checklist item and gives methodological background  
9 and published examples of transparent reporting. The STROBE checklist is best used in conjunction with this article  
10 (freely available on the Web sites of PLoS Medicine at <http://www.plosmedicine.org/>, Annals of Internal Medicine  
11 at <http://www.annals.org/>, and Epidemiology at <http://www.epidem.com/>). Information on the STROBE Initiative  
12 is available at [www.strobe-statement.org](http://www.strobe-statement.org).  
13  
14  
15  
16  
17  
18  
19  
20  
21  
22  
23  
24  
25  
26  
27  
28  
29  
30  
31  
32  
33  
34  
35  
36  
37  
38  
39  
40  
41  
42  
43  
44  
45  
46  
47  
48  
49  
50  
51  
52  
53  
54  
55  
56  
57  
58  
59  
60
