# Supplementary material for: Predictors of health-related quality of life among patients with diabetes on follow-up at Nekemte specialised Hospital, Western Ethiopia: a cross-sectional study
Source: PubMed Central journal article supplement — BMJ Open. 2020 Jul 28;10(7):e036106. doi: 10.1136/bmjopen-2019-036106 (PMC7389510; doi:10.1136/bmjopen-2019-036106), 2020-07-28
Supplement: bmjopen-2019-036106supp001.pdf [file bmjopen-2019-036106supp001.pdf]

**Annexes****Annex I**

Table showing correlation matrix of the eight domains among *diabetic patients on follow up at NSH, East Wollega , West Ethiopia, 2019, (n=215)*

| <b>Correlation Matrix</b> |       |       |       |       |       |       |       |       |               |
|---------------------------|-------|-------|-------|-------|-------|-------|-------|-------|---------------|
|                           | PF    | RP    | VT    | MH    | BP    | GH    | RE    | SF    | Overall HRQoL |
| PF                        | 1.000 |       |       |       |       |       |       |       |               |
| RP                        | .631  | 1.000 |       |       |       |       |       |       |               |
| VT                        | .089  | .127  | 1.000 |       |       |       |       |       |               |
| MH                        | .125  | .208  | .294  | 1.000 |       |       |       |       |               |
| BP                        | .043  | .092  | -.018 | -.002 | 1.000 |       |       |       |               |
| GH                        | .455  | .511  | .133  | .113  | -.030 | 1.000 |       |       |               |
| RE                        | .380  | .683  | .071  | .191  | .034  | .274  | 1.000 |       |               |
| SF                        | .590  | .640  | .166  | .276  | .042  | .549  | .327  | 1.000 |               |
| Overall HRQoL             | .763  | .916  | .207  | .301  | .128  | .637  | .747  | .765  | 1.000         |

**Annex II**

Table showing the two component summary measures derived from principal component analysis for HRQoL among diabetic patients at NHS, western Ethiopia, 2019, (n=215).

| <b>Domains</b>       | <b>Component 1 (PCS)</b> | <b>Component 2 (MCS)</b> |
|----------------------|--------------------------|--------------------------|
| Physical functioning | 0.83                     |                          |
| Role physical        | 0.85                     |                          |
| Vitality             |                          | 0.81                     |
| Mental Health        |                          | 0.79                     |
| General health       | 0.75                     |                          |
| Bodily pain          | 0.93                     |                          |
| Social functioning   |                          | 0.83                     |
| Role emotional       |                          | 0.68                     |
